# Supplementary material for: o-Semiquinone radical anion isolated as an amorphous porous solid
Source: Royal Society of Chemistry journal article supplement (doi:10.1039/d1cp01596f), 2021-01-01
Supplement: d1cp01596f1.pdf [file d1cp01596f1.pdf]

# **o-Semiquinone radical anion isolated as an amorphous porous solid**

Maciej Witwicki<sup>a,\*</sup>, Agnieszka Lewińska<sup>a</sup>, Andrew Ozarowski<sup>b</sup>

<sup>a</sup>Faculty of Chemistry, Wrocław University, Joliot-Curie 14, 50-383 Wrocław, Poland

<sup>b</sup>National High Magnetic Field Laboratory, Florida State University, 1800 East Paul Dirac Drive, Tallahassee, FL 32310, United States

\* [maciej.witwicki@chem.uni.wroc.pl](mailto:maciej.witwicki@chem.uni.wroc.pl)

## **Table of Contents**

|   |                                             |    |
|---|---------------------------------------------|----|
| 1 | Experimental and computational details..... | 2  |
|   | Materials.....                              | 2  |
|   | Generating radical systems.....             | 2  |
|   | Physical measurements.....                  | 2  |
|   | Theoretical calculations.....               | 3  |
| 2 | Supporting Figures.....                     | 7  |
| 3 | Supporting Tables.....                      | 17 |

# 1 COMPUTATIONAL DETAILS OF THE G TENSOR

In the course of this work, the atomic contributions to the principal components of the  $\mathbf{g}$  tensor were estimated. The  $g_{rs}$  components of the  $\mathbf{g}$  tensor can be expressed as a sum of four contributions<sup>1-5</sup>:

$$g_{rs} = \delta_{rs} g_e + \delta_{rs} \Delta g^{RMC} + \Delta g_{rs}^{DSO} + \Delta g_{rs}^{PSO},$$

in which  $g_e = 2,002319$  is of the free electron g-value,  $\delta_{rs}$  is the Kronecker delta ensuring that  $g_e$  and  $\Delta g^{RMC}$ , that is the contribution to  $g_{rs}$  stemming from the relativistic mass correction, contribute only to the diagonal elements of the g matrix. The  $\Delta g^{DSO}$  and  $\Delta g^{PSO}$  contributions are the diamagnetic spin-orbit term (previously referred to as “gauge correction”) and the paramagnetic spin-orbit term (or orbital Zeeman/spin-orbit coupling cross term). The exact definitions of  $\Delta g^{RMC}$ ,  $\Delta g^{DSO}$  and  $\Delta g^{PSO}$  can be found in literature<sup>1-5</sup>.  $\Delta g^{RMC}$  and  $\Delta g^{DSO}$  tend to be of minor magnitude. Moreover, in the case of semiquinones their opposite signs lead to the mutual cancellation of these two terms (Table S3), whereby  $\Delta g^{PSO}$  determines the observed values of  $g_{rs}$ . Appropriate approximation of the atomic contributions to the  $\mathbf{g}$  tensor can be thus obtained through the breakdown of the  $\Delta g^{PSO}$  term into contributions from each of the atoms. The mean-field approximation to the molecular spin-orbit coupling operator employed in this work [RI-SOMF(1X)]<sup>6</sup> takes into account the multicenter terms (except for the exchange part), therefore these multicenter terms were neglected to obtain the atomic contributions. Considering that such an omission may cause significant errors<sup>6,7</sup>, the  $\Delta g^{PSO}$  values calculated in the one-center approximation were compared with those calculated when taking the multicenter terms into account. The comparison (Table S3) revealed only slight deviations.

## References

- 1 I. Ciofini, R. Reviakine, A. Arbuznikov and M. Kaupp, *Theor. Chem. Acc.*, 2004, **111**, 132–140.
- 2 M. Kaupp, C. Remenyi, J. Vaara, O. L. Malkina and V. G. Malkin, *J. Am. Chem. Soc.*, 2002, **124**, 2709–2722.
- 3 F. Neese, *J. Chem. Phys.*, 2001, **115**, 11080–11096.
- 4 F. Neese, *Coord. Chem. Rev.*, 2009, **253**, 526–563.
- 5 M. Kaupp, M. Bühl and V. G. Malkin, Eds., *Calculation of NMR and EPR Parameters. Theory and Applications*, Wiley-VCH, Weinheim, 2004.
- 6 F. Neese, *J. Chem. Phys.*, 2005, **122**, 034107.
- 7 M. Witwicki, *ChemPhysChem*, 2015, **16**, 1912–1925.

## 2 SUPPORTING FIGURES

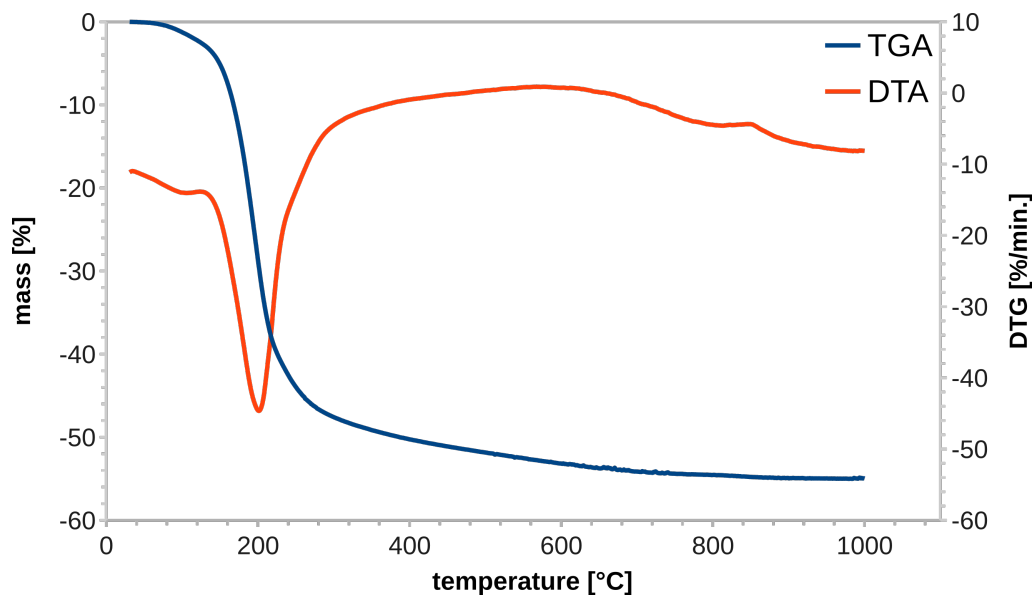

**Fig. S1** Thermograms of TGA and DTA for **1**.

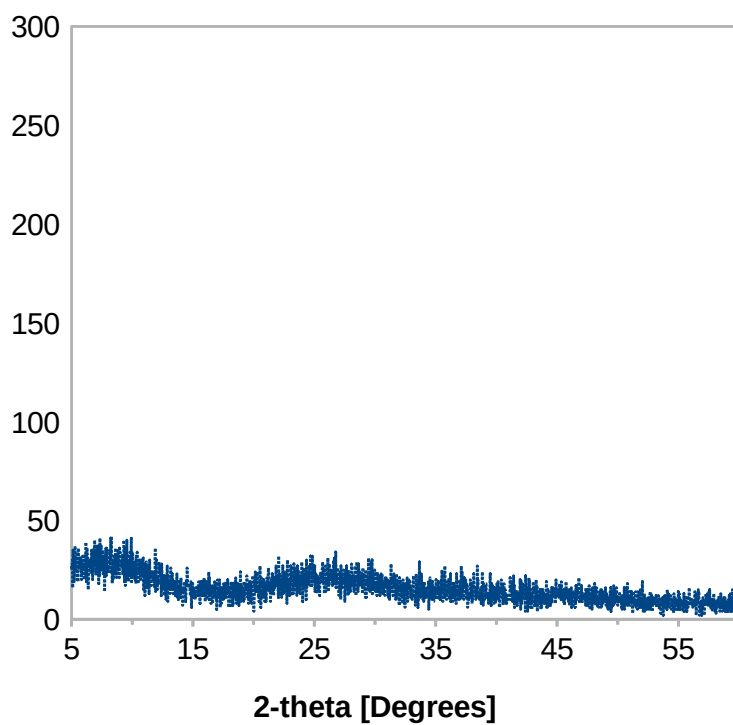

**Fig. S2** Powder X-ray diffraction for **1**.

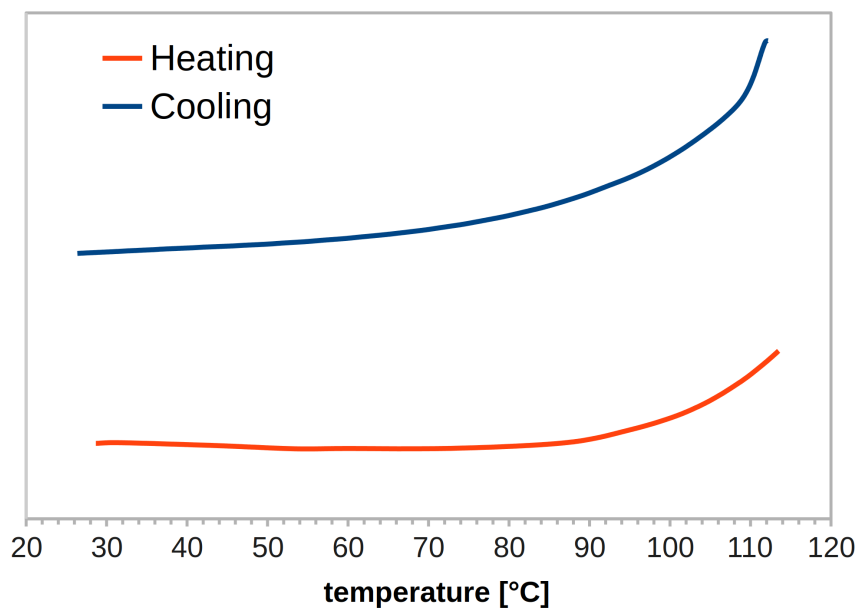

**Fig. S3** DSC traces for **1** during the cooling and heating scans (rate 10 K/min).

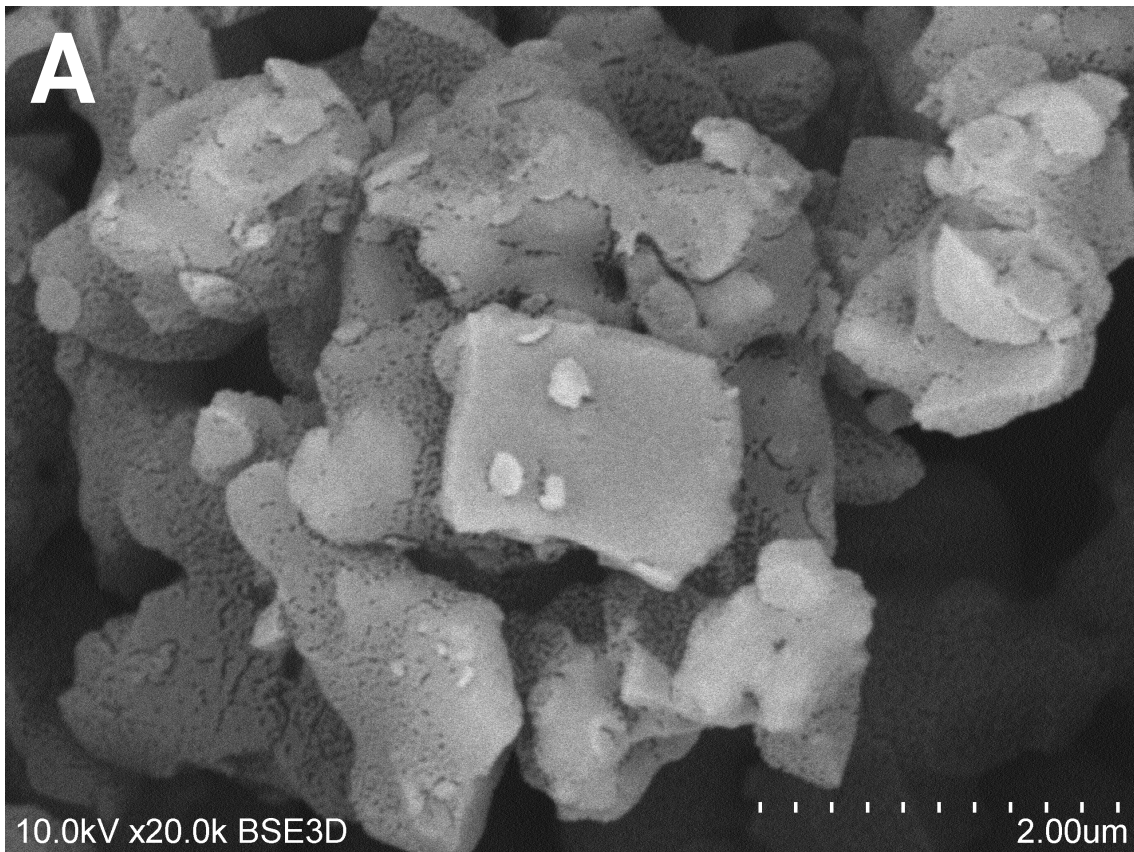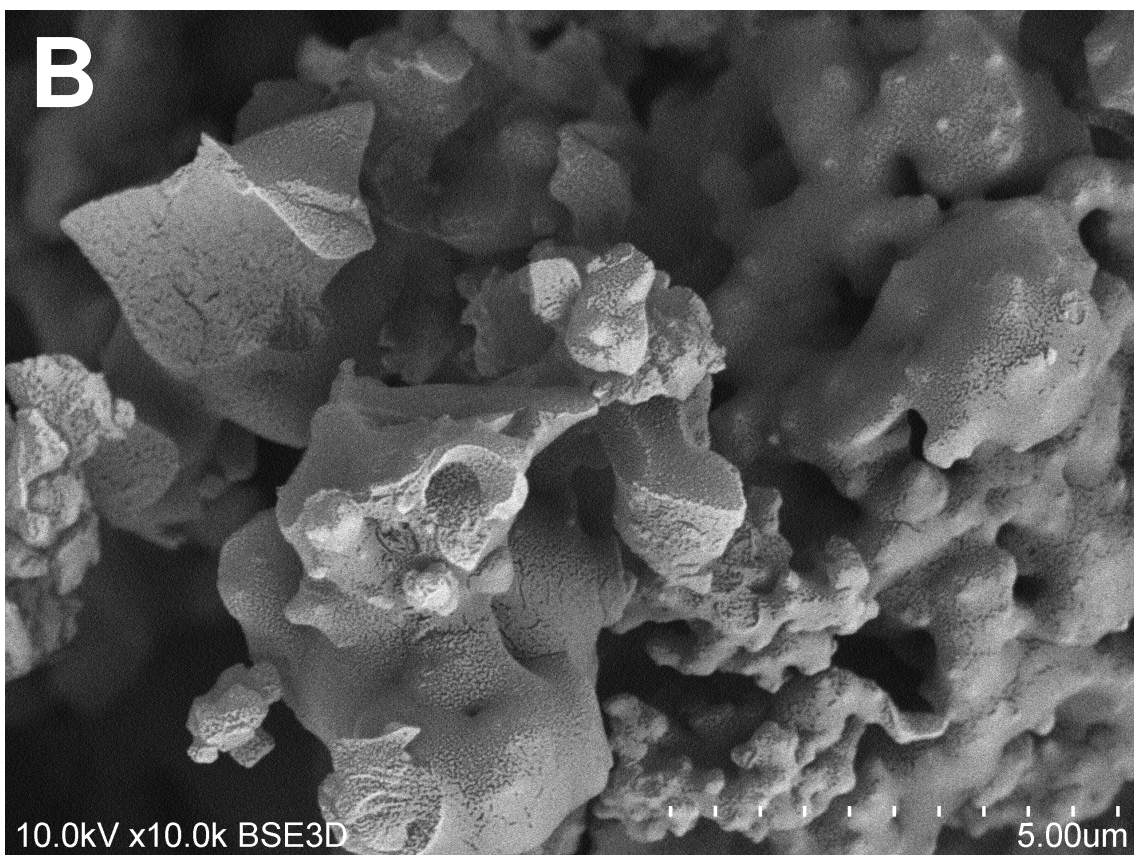

**Fig. S4.** SEM micrographs presenting morphology of **1** at different magnifications. In addition, the sizes of pour diameters are shown.

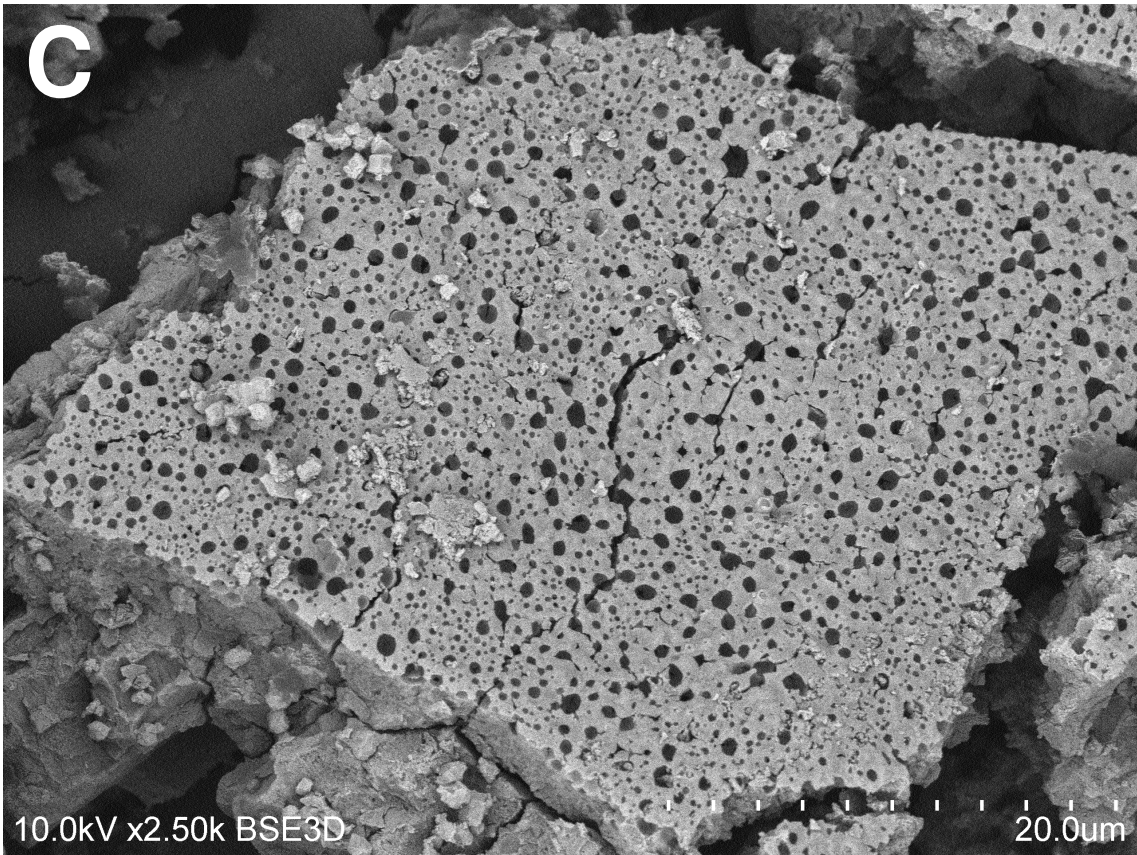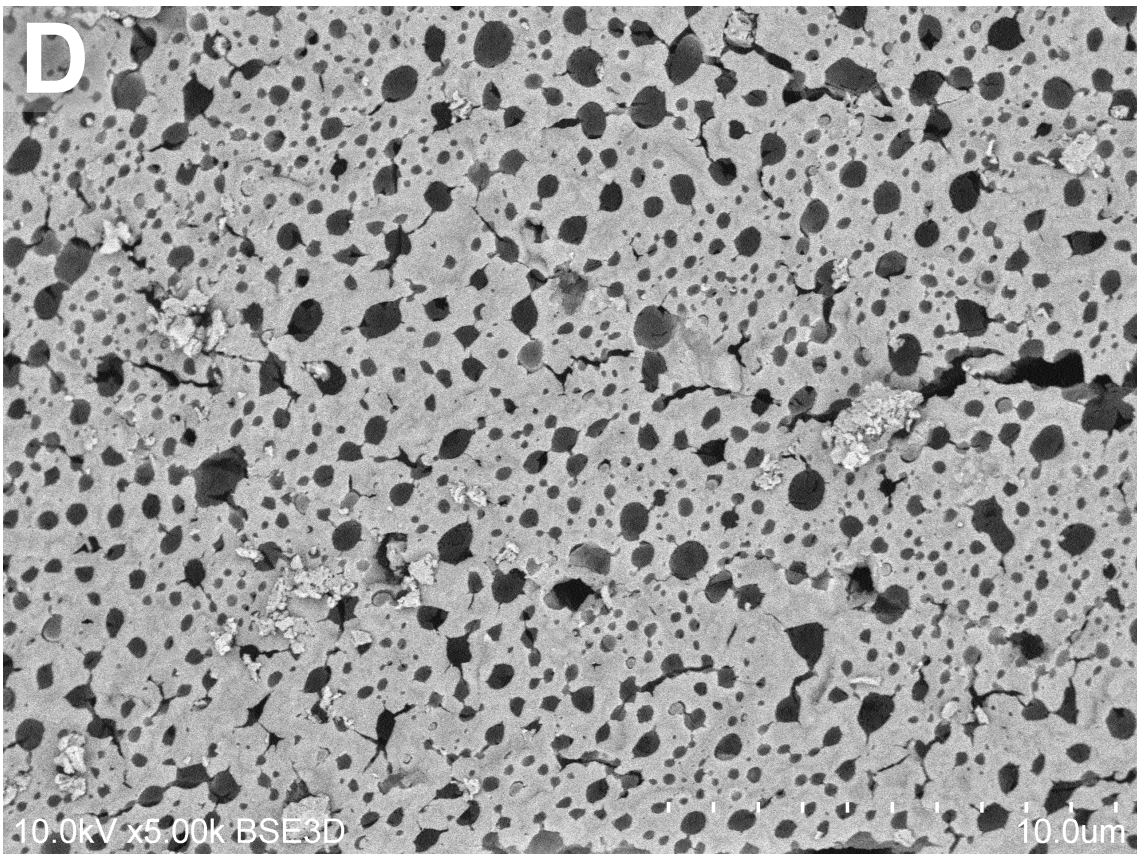

**Fig. S4 Continued.**

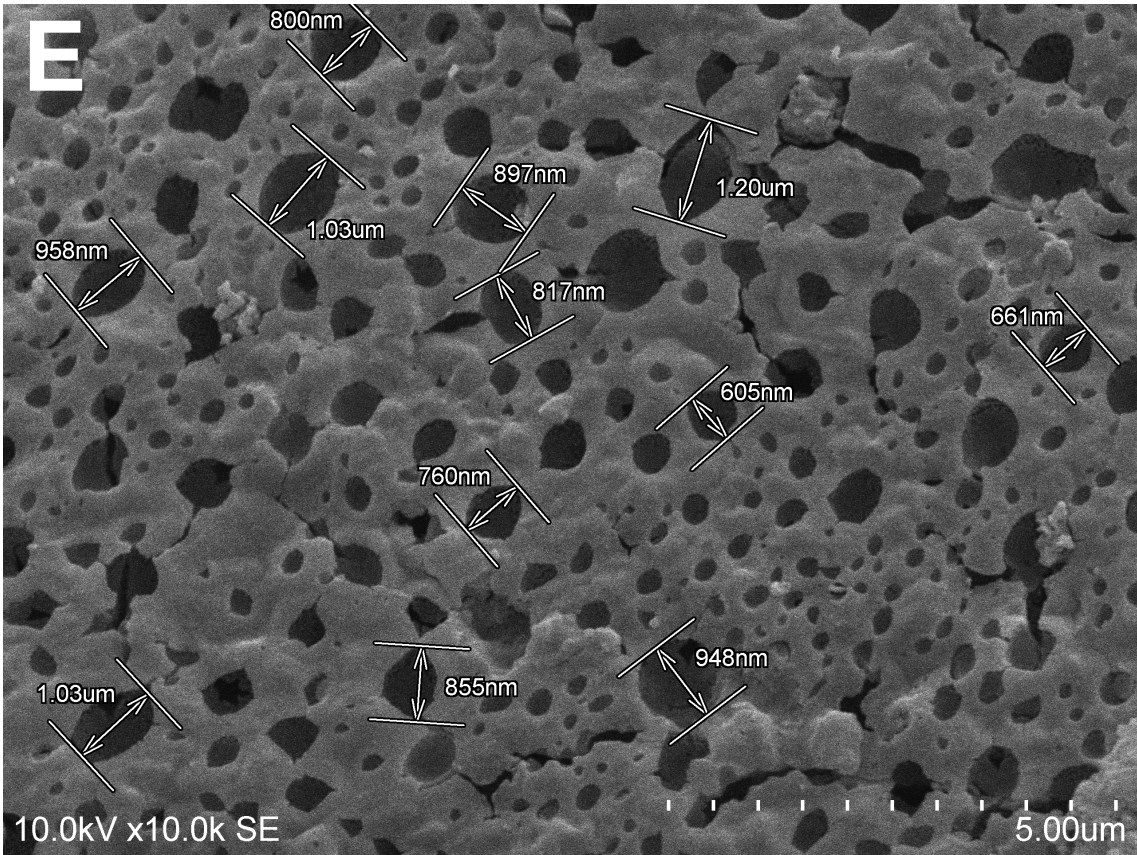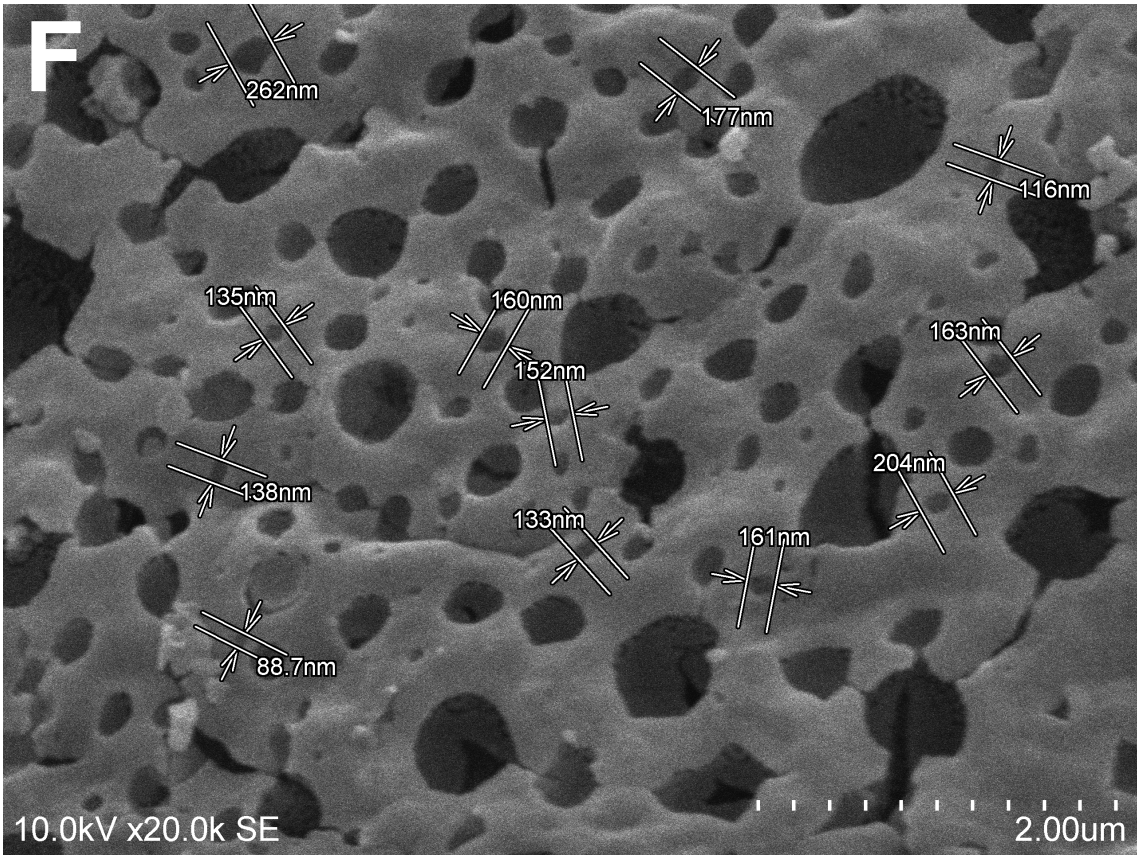

**Fig. S4 Continued.**

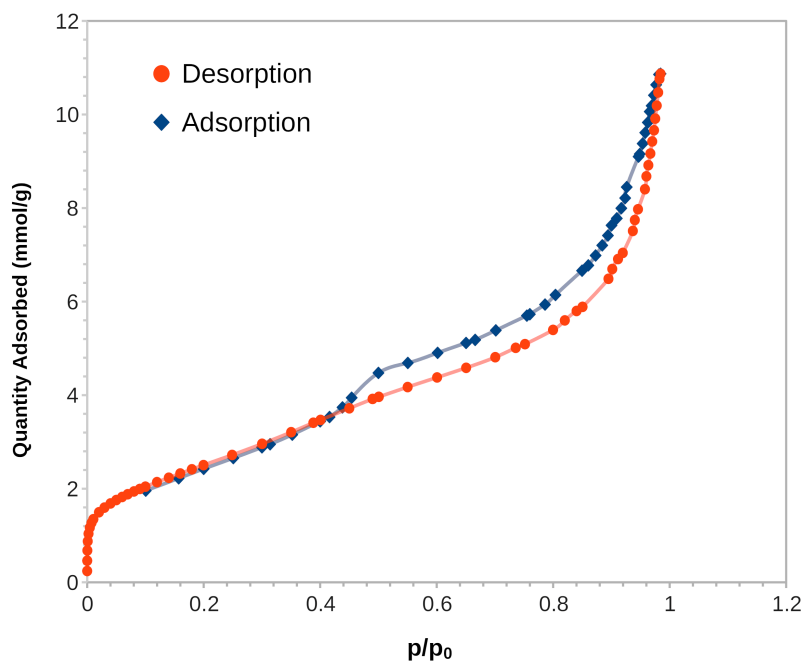

**Fig. S5** N<sub>2</sub> adsorption isotherms measured at 77 K for **1**.

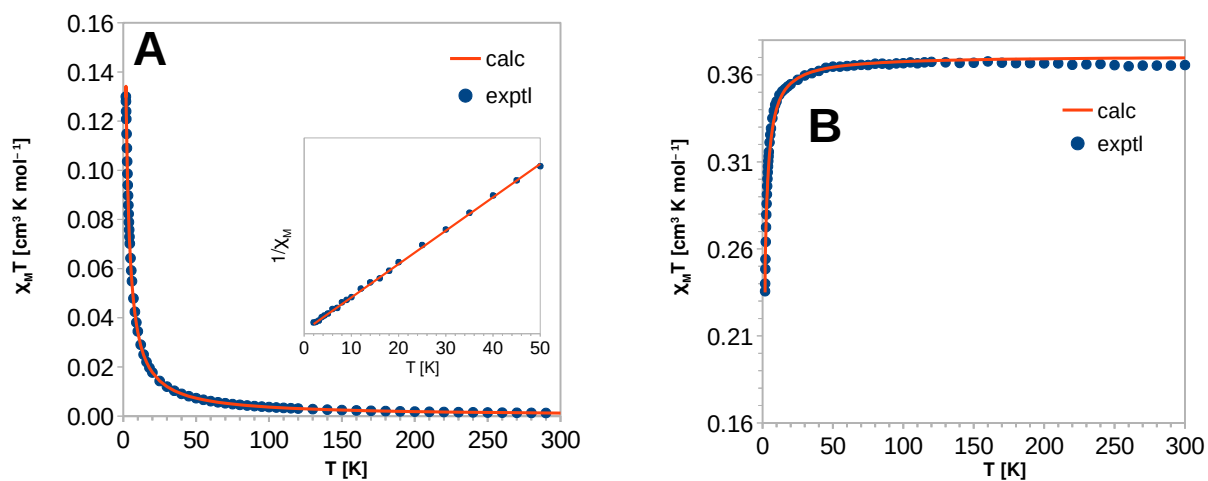

**Fig. S6** Temperature dependence of  $\chi_M$  for **1**, the inset shows  $1/\chi_M$  (A) and the product  $\chi_M T$  with a fit to the Curie-Weiss law (B).



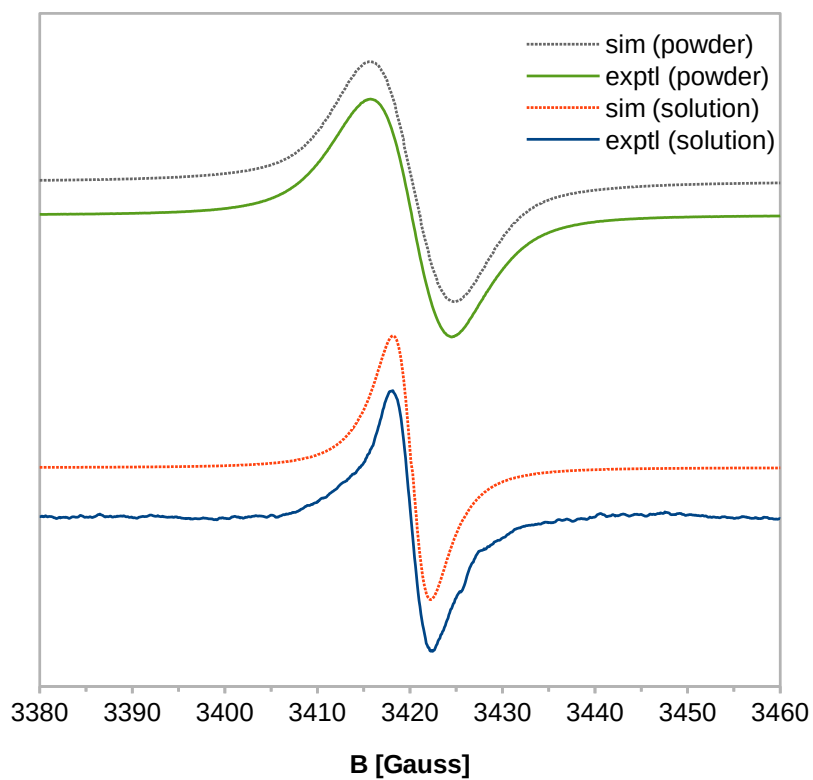

**Fig. S7** X-band (~9.7 GHz) EPR spectra of **1** recorded at 77 K for powder (green) and frozen methanol solution (blue).

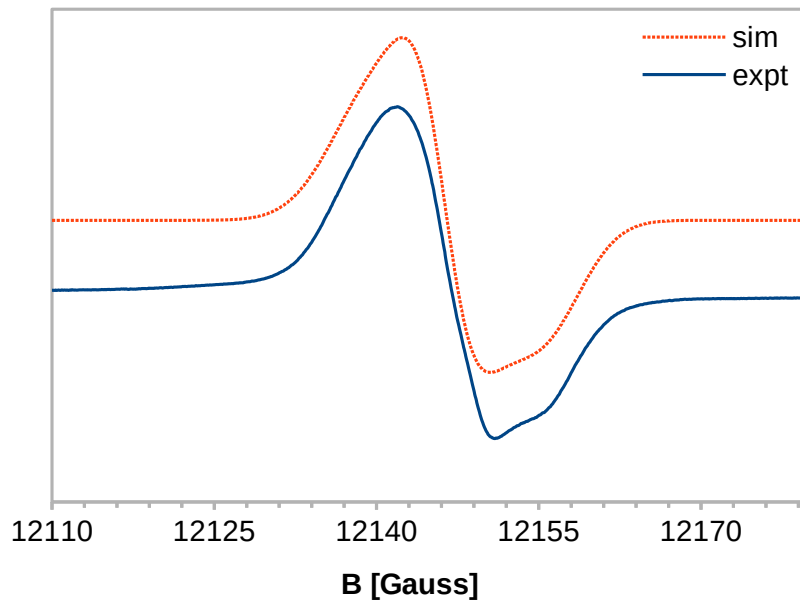

**Fig. S8** Q-band (~34 GHz) EPR spectra of **1** recorded at 110 K for powder.

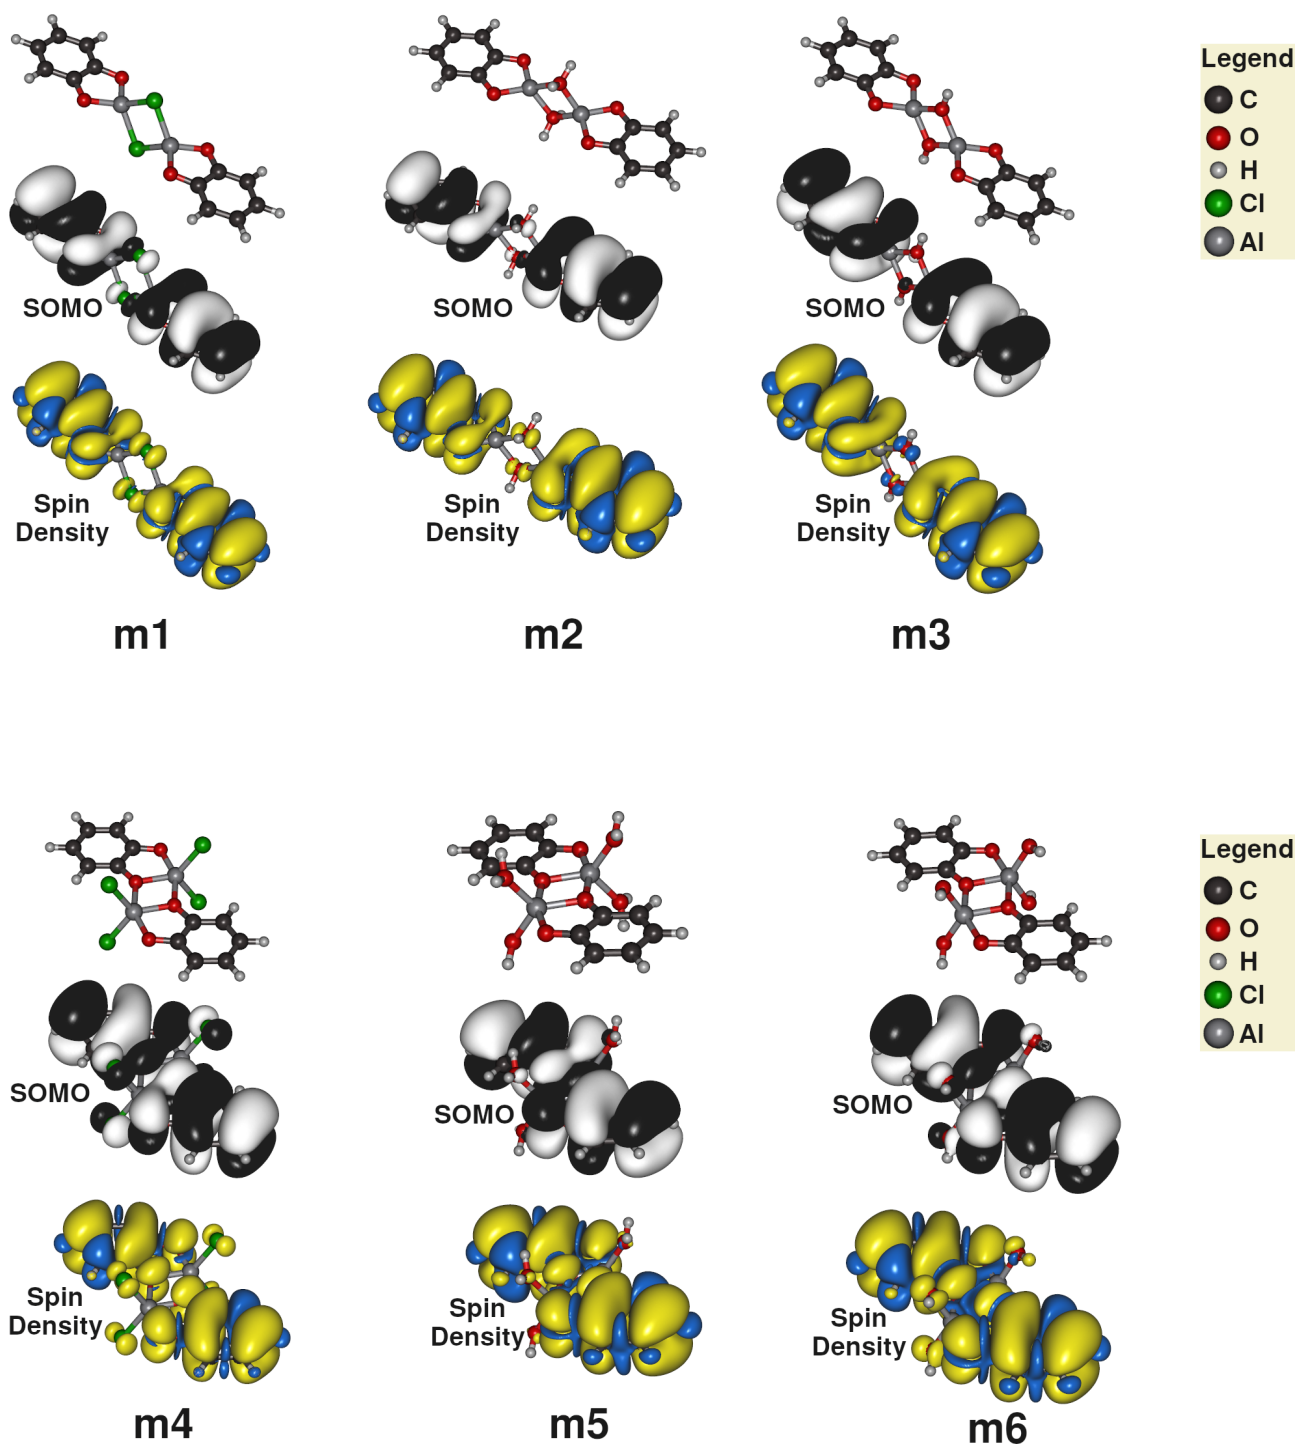

**Fig. S9** Molecular models of the Al radical complex (1) optimized at the BP86/def2-TZVP level. Singly-occupied molecular orbitals (contoured at isovalue  $10^{-2}$ ) and spin density (contoured at isovalue  $10^{-4}$ ) calculated at the B3LYP/IGLO-III level.

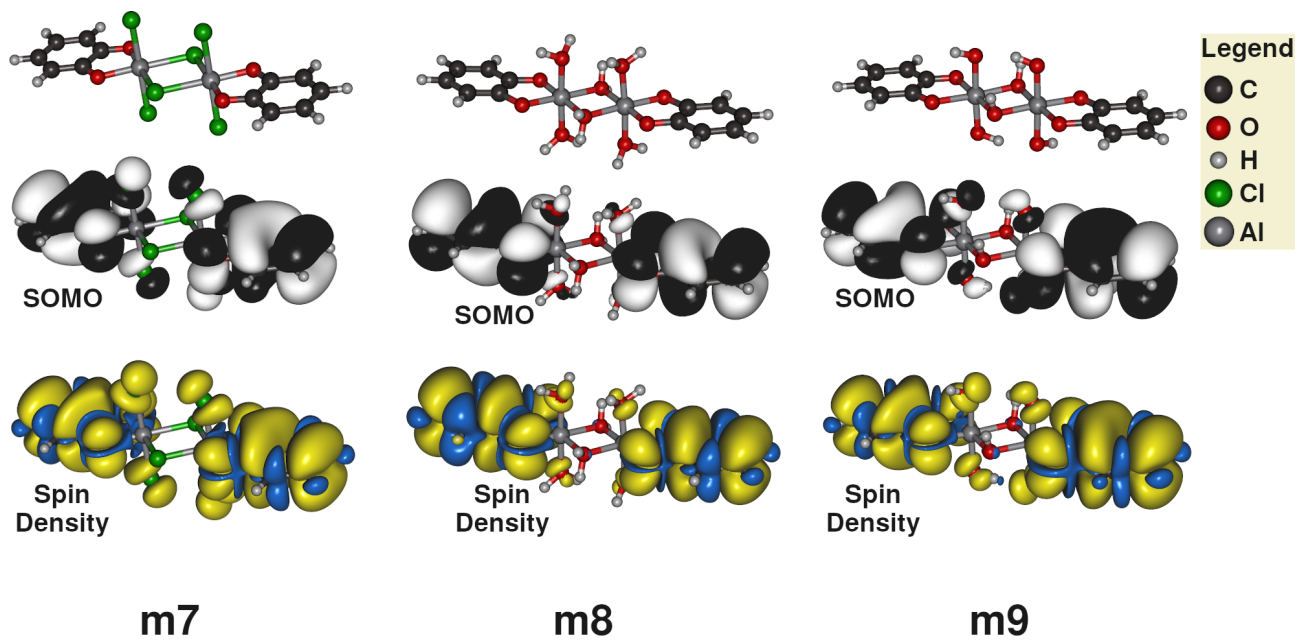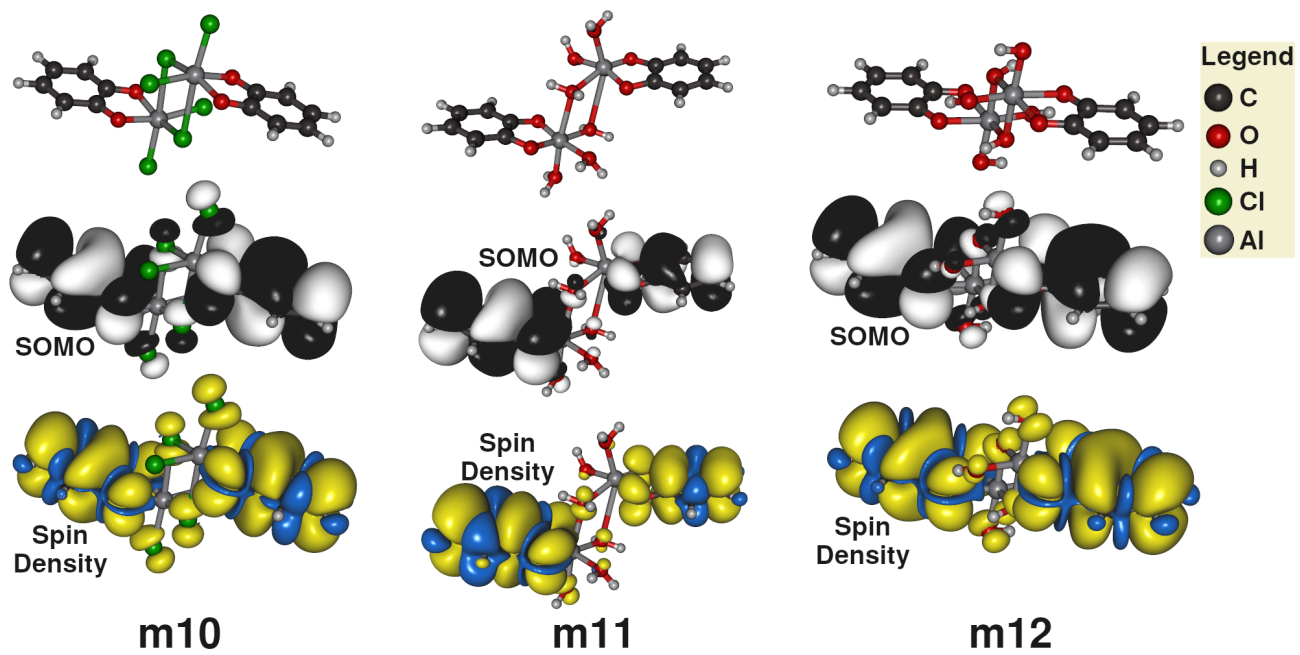

Fig. S9 Continued.

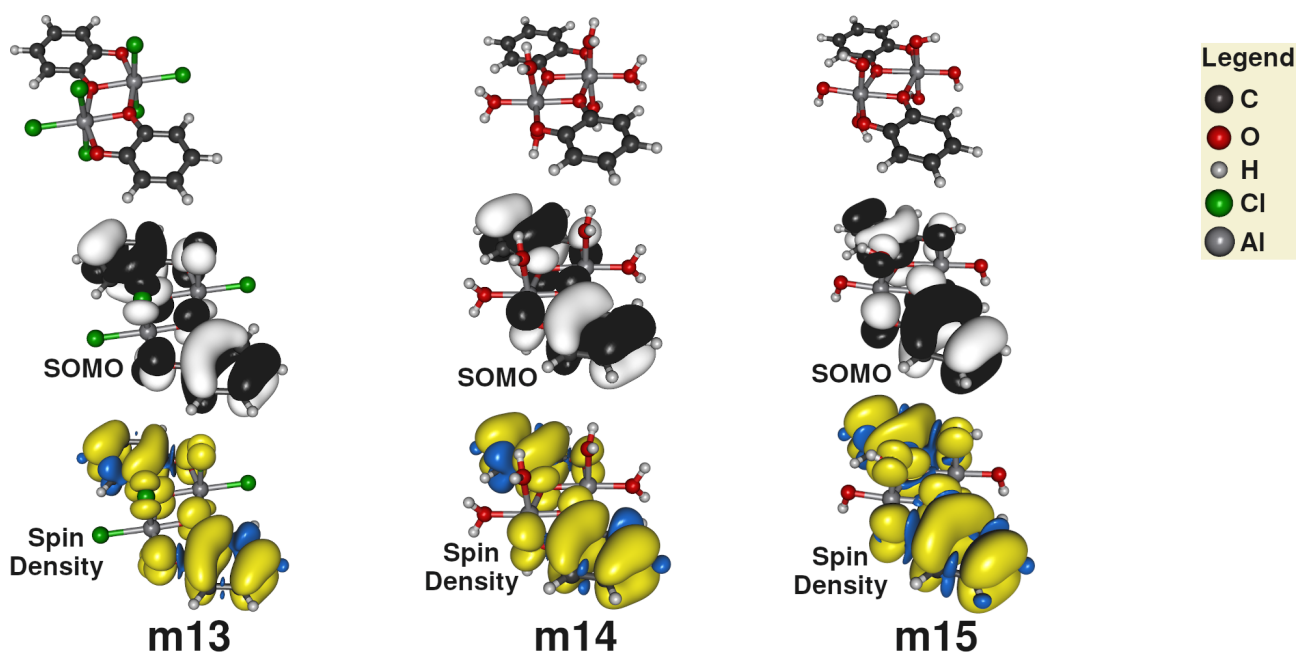

Fig. S9 Continued.

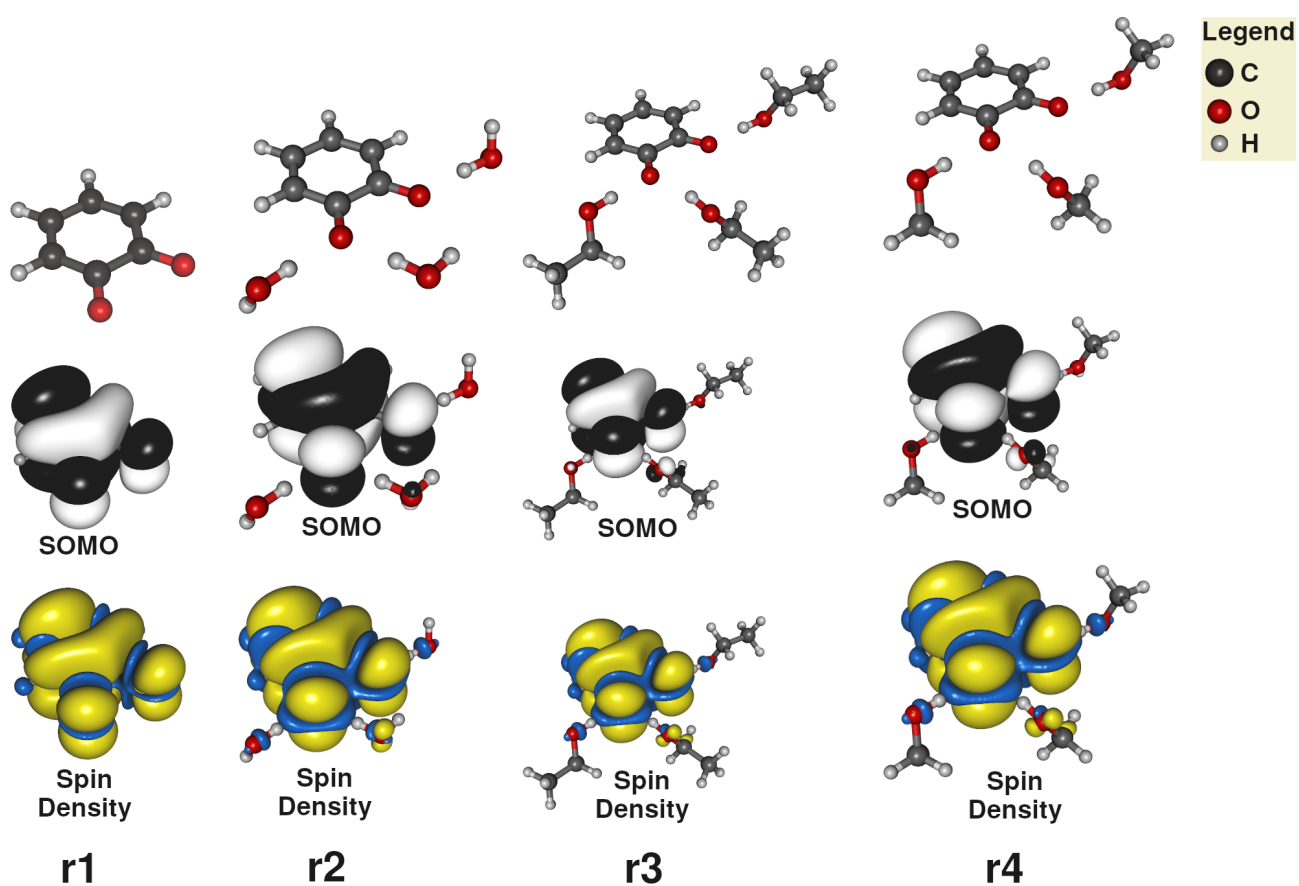

Fig. S10 Molecular models of o-semiquinone with hydrogen bonded solvent molecules optimized at the BP86/def2-TZVP level. Singly-occupied molecular orbitals (contoured at isovalue  $10^{-2}$ ) and spin density (contoured at isovalue  $10^{-4}$ ) calculated at the B3LYP/IGLO-III level.

### 3 SUPPORTING TABLES

**Table S1** The principal components of the g tensors calculated at the DFT level.

| model                                           | c.n. | composition                                                                | basis set | UB3LYP         |                |                |                | UPBE0          |                |                |                | TPSS0          |                |                |                |
|-------------------------------------------------|------|----------------------------------------------------------------------------|-----------|----------------|----------------|----------------|----------------|----------------|----------------|----------------|----------------|----------------|----------------|----------------|----------------|
|                                                 |      |                                                                            |           | $g_z$          | $g_y$          | $g_x$          | $g_{iso}$      | $g_z$          | $g_y$          | $g_x$          | $g_{iso}$      | $g_z$          | $g_y$          | $g_x$          | $g_{iso}$      |
| m1                                              | 4    | [Al <sub>2</sub> (sq)(ct)(Cl) <sub>2</sub> ] <sup>+•</sup>                 | IGLO-II   | 2.00116        | 2.00484        | 2.00488        | 2.00363        | 2.00122        | 2.00483        | 2.00484        | 2.00363        | 2.00131        | 2.00464        | 2.00472        | 2.00356        |
|                                                 |      |                                                                            | IGLO-III  | 2.00104        | 2.00480        | 2.00491        | 2.00358        | 2.00111        | 2.00476        | 2.00490        | 2.00359        | 2.00121        | 2.00458        | 2.00480        | 2.00353        |
| m2                                              | 4    | [Al <sub>2</sub> (sq)(ct)(H <sub>2</sub> O) <sub>2</sub> ] <sup>+•3+</sup> | IGLO-II   | 2.00224        | 2.00440        | 2.00441        | 2.00368        | 2.00230        | 2.00412        | 2.00425        | 2.00356        | 2.00231        | 2.00392        | 2.00415        | 2.00346        |
|                                                 |      |                                                                            | IGLO-III  | 2.00225        | 2.00429        | 2.00448        | 2.00367        | 2.00230        | 2.00405        | 2.00434        | 2.00357        | 2.00230        | 2.00387        | 2.00424        | 2.00347        |
| m3                                              | 4    | [Al <sub>2</sub> (sq)(ct)(OH) <sub>2</sub> ] <sup>+•</sup>                 | IGLO-II   | 2.00210        | 2.00465        | 2.00503        | 2.00393        | 2.00212        | 2.00464        | 2.00500        | 2.00392        | 2.00213        | 2.00455        | 2.00480        | 2.00383        |
|                                                 |      |                                                                            | IGLO-III  | 2.00208        | 2.00478        | 2.00493        | 2.00393        | 2.00209        | 2.00478        | 2.00490        | 2.00392        | 2.00211        | 2.00469        | 2.00471        | 2.00384        |
| m4                                              | 5    | [Al <sub>2</sub> (sq)(ct)(Cl) <sub>4</sub> ] <sup>+•-</sup>                | IGLO-II   | 2.00466        | 2.00493        | 2.00559        | 2.00506        | 2.00460        | 2.00466        | 2.00556        | 2.00494        | 2.00439        | 2.00452        | 2.00534        | 2.00475        |
|                                                 |      |                                                                            | IGLO-III  | 2.00470        | 2.00475        | 2.00538        | 2.00494        | 2.00446        | 2.00471        | 2.00535        | 2.00484        | 2.00423        | 2.00461        | 2.00516        | 2.00466        |
| m5                                              | 5    | [Al <sub>2</sub> (sq)(ct)(H <sub>2</sub> O) <sub>4</sub> ] <sup>+•3+</sup> | IGLO-II   | 2.00246        | 2.00434        | 2.00496        | 2.00392        | 2.00246        | 2.00433        | 2.00492        | 2.00390        | 2.00245        | 2.00423        | 2.00475        | 2.00381        |
|                                                 |      |                                                                            | IGLO-III  | 2.00246        | 2.00439        | 2.00485        | 2.00390        | 2.00241        | 2.00425        | 2.00471        | 2.00379        | 2.00238        | 2.00408        | 2.00453        | 2.00366        |
| m6                                              | 5    | [Al <sub>2</sub> (sq)(ct)(OH) <sub>4</sub> ] <sup>+•-</sup>                | IGLO-II   | 2.00267        | 2.00483        | 2.00610        | 2.00453        | 2.00252        | 2.00482        | 2.00596        | 2.00443        | 2.00240        | 2.00471        | 2.00560        | 2.00424        |
|                                                 |      |                                                                            | IGLO-III  | 2.00263        | 2.00491        | 2.00587        | 2.00447        | 2.00242        | 2.00489        | 2.00568        | 2.00433        | 2.00235        | 2.00477        | 2.00537        | 2.00416        |
| m7                                              | 6    | [Al <sub>2</sub> (sq)(ct)(Cl) <sub>6</sub> ] <sup>+•3-</sup>               | IGLO-II   | 2.00013        | 2.00570        | 2.00993        | 2.00525        | 2.00052        | 2.00557        | 2.00786        | 2.00465        | 2.00077        | 2.00527        | 2.00730        | 2.00445        |
|                                                 |      |                                                                            | IGLO-III  | 2.00012        | 2.00546        | 2.01021        | 2.00526        | 2.00051        | 2.00533        | 2.00828        | 2.00471        | 2.00076        | 2.00505        | 2.00770        | 2.00451        |
| m8                                              | 6    | [Al <sub>2</sub> (sq)(ct)(H <sub>2</sub> O) <sub>6</sub> ] <sup>+•3+</sup> | IGLO-II   | 2.00229        | 2.00503        | 2.00662        | 2.00465        | 2.00232        | 2.00506        | 2.00608        | 2.00449        | 2.00233        | 2.00477        | 2.00585        | 2.00432        |
|                                                 |      |                                                                            | IGLO-III  | 2.00230        | 2.00520        | 2.00641        | 2.00464        | 2.00232        | 2.00506        | 2.00608        | 2.00449        | 2.00233        | 2.00494        | 2.00574        | 2.00434        |
| m9                                              | 6    | [Al <sub>2</sub> (sq)(ct)(OH) <sub>6</sub> ] <sup>+•3-</sup>               | IGLO-II   | 2.00172        | 2.00591        | 2.00704        | 2.00489        | 2.00196        | 2.00544        | 2.00686        | 2.00475        | 2.00201        | 2.00528        | 2.00650        | 2.00460        |
|                                                 |      |                                                                            | IGLO-III  | 2.00186        | 2.00586        | 2.00676        | 2.00482        | 2.00197        | 2.00565        | 2.00669        | 2.00477        | 2.00152        | 2.00591        | 2.00674        | 2.00472        |
| m10                                             | 6    | [Al <sub>2</sub> (sq)(ct)(Cl) <sub>6</sub> ] <sup>+•3-</sup>               | IGLO-II   | 2.00176        | 2.00613        | 2.00645        | 2.00478        | 2.00173        | 2.00579        | 2.00607        | 2.00453        | 2.00179        | 2.00544        | 2.00580        | 2.00434        |
|                                                 |      |                                                                            | IGLO-III  | 2.00175        | 2.00613        | 2.00661        | 2.00483        | 2.00172        | 2.00559        | 2.00645        | 2.00459        | 2.00178        | 2.00528        | 2.00614        | 2.00440        |
| m11                                             | 6    | [Al <sub>2</sub> (sq)(ct)(H <sub>2</sub> O) <sub>6</sub> ] <sup>+•3+</sup> | IGLO-II   | 2.00233        | 2.00476        | 2.00516        | 2.00408        | 2.00231        | 2.00474        | 2.00501        | 2.00402        | 2.00231        | 2.00463        | 2.00475        | 2.00389        |
|                                                 |      |                                                                            | IGLO-III  | 2.00232        | 2.00489        | 2.00505        | 2.00408        | 2.00231        | 2.00485        | 2.00491        | 2.00403        | 2.00231        | 2.00466        | 2.00474        | 2.00390        |
| m12                                             | 6    | [Al <sub>2</sub> (sq)(ct)(OH) <sub>6</sub> ] <sup>+•3-</sup>               | IGLO-II   | 2.00215        | 2.00542        | 2.00716        | 2.00491        | 2.00223        | 2.00526        | 2.00687        | 2.00479        | 2.00224        | 2.00513        | 2.00651        | 2.00463        |
|                                                 |      |                                                                            | IGLO-III  | 2.00215        | 2.00559        | 2.00694        | 2.00489        | 2.00222        | 2.00546        | 2.00669        | 2.00479        | 2.00223        | 2.00533        | 2.00635        | 2.00464        |
| m13                                             | 6    | [Al <sub>2</sub> (sq)(ct)(Cl) <sub>6</sub> ] <sup>+•3-</sup>               | IGLO-II   | 2.00283        | 2.00768        | 2.00868        | 2.00639        | 2.00286        | 2.00745        | 2.00777        | 2.00603        | 2.00270        | 2.00648        | 2.00748        | 2.00555        |
|                                                 |      |                                                                            | IGLO-III  | 2.00277        | 2.00764        | 2.00788        | 2.00610        | 2.00258        | 2.00651        | 2.00811        | 2.00573        | 2.00222        | 2.00589        | 2.00762        | 2.00524        |
| m14                                             | 6    | [Al <sub>2</sub> (sq)(ct)(H <sub>2</sub> O) <sub>6</sub> ] <sup>+•3+</sup> | IGLO-II   | 2.00237        | 2.00456        | 2.00524        | 2.00406        | 2.00238        | 2.00455        | 2.00519        | 2.00404        | 2.00237        | 2.00445        | 2.00501        | 2.00394        |
|                                                 |      |                                                                            | IGLO-III  | 2.00237        | 2.00462        | 2.00515        | 2.00404        | 2.00237        | 2.00460        | 2.00511        | 2.00403        | 2.00236        | 2.00450        | 2.00494        | 2.00393        |
| m15                                             | 6    | [Al <sub>2</sub> (sq)(ct)(OH) <sub>6</sub> ] <sup>+•3-</sup>               | IGLO-II   | 2.00257        | 2.00554        | 2.00736        | 2.00516        | 2.00253        | 2.00552        | 2.00734        | 2.00513        | 2.00238        | 2.00539        | 2.00683        | 2.00487        |
|                                                 |      |                                                                            | IGLO-III  | 2.00246        | 2.00561        | 2.00706        | 2.00504        | 2.00234        | 2.00561        | 2.00688        | 2.00494        | 2.00225        | 2.00548        | 2.00643        | 2.00472        |
| <b>experimental for complex (1)</b>             |      |                                                                            |           | <b>2.00204</b> | <b>2.00377</b> | <b>2.00455</b> | <b>2.00367</b> | <b>2.00204</b> | <b>2.00377</b> | <b>2.00455</b> | <b>2.00367</b> | <b>2.00204</b> | <b>2.00377</b> | <b>2.00455</b> | <b>2.00367</b> |
| r1                                              | -    | sq <sup>+•-</sup>                                                          | IGLO-II   | 2.00219        | 2.00639        | 2.00728        | 2.00529        | 2.00219        | 2.00642        | 2.00730        | 2.00530        | 2.00217        | 2.00618        | 2.00689        | 2.00508        |
|                                                 |      |                                                                            | IGLO-III  | 2.00219        | 2.00620        | 2.00703        | 2.00514        | 2.00219        | 2.00623        | 2.00705        | 2.00516        | 2.00218        | 2.00601        | 2.00667        | 2.00495        |
| r2                                              | -    | sq <sup>+•-</sup> × 3H <sub>2</sub> O                                      | IGLO-II   | 2.00220        | 2.00595        | 2.00655        | 2.00490        | 2.00220        | 2.00594        | 2.00654        | 2.00489        | 2.00219        | 2.00574        | 2.00623        | 2.00472        |
|                                                 |      |                                                                            | IGLO-III  | 2.00220        | 2.00583        | 2.00637        | 2.00480        | 2.00220        | 2.00583        | 2.00636        | 2.00480        | 2.00219        | 2.00563        | 2.00608        | 2.00463        |
| r3                                              | -    | sq <sup>+•-</sup> × 3EtOH                                                  | IGLO-II   | 2.00223        | 2.00589        | 2.00658        | 2.00490        | 2.00223        | 2.00587        | 2.00658        | 2.00489        | 2.00222        | 2.00568        | 2.00626        | 2.00472        |
|                                                 |      |                                                                            | IGLO-III  | 2.00224        | 2.00587        | 2.00650        | 2.00487        | 2.00224        | 2.00586        | 2.00649        | 2.00486        | 2.00222        | 2.00567        | 2.00619        | 2.00469        |
| r4                                              | -    | sq <sup>+•-</sup> × 3MeOH                                                  | IGLO-II   | 2.00224        | 2.00592        | 2.00659        | 2.00491        | 2.00223        | 2.00590        | 2.00658        | 2.00491        | 2.00222        | 2.00571        | 2.00627        | 2.00473        |
|                                                 |      |                                                                            | IGLO-III  | 2.00224        | 2.00587        | 2.00649        | 2.00487        | 2.00223        | 2.00586        | 2.00648        | 2.00486        | 2.00222        | 2.00567        | 2.00618        | 2.00469        |
| <b>experimental for uncomplexed radical (2)</b> |      |                                                                            |           | <b>2.00233</b> | <b>2.00534</b> | <b>2.00573</b> | <b>2.00469</b> | <b>2.00233</b> | <b>2.00534</b> | <b>2.00573</b> | <b>2.00469</b> | <b>2.00233</b> | <b>2.00534</b> | <b>2.00573</b> | <b>2.00469</b> |

**Table S2** The total Löwdin spin populations for selected groups of atoms calculated at the B3LYP/IGLO-III level.

| model | c.n. | composition                                                               | On both Al atoms | On all O atoms | On O atoms in sq and ct | On O atoms in H <sub>2</sub> O | On O atoms in OH <sup>-</sup> | On Cl atoms | On O atoms in H-bonded molecules |
|-------|------|---------------------------------------------------------------------------|------------------|----------------|-------------------------|--------------------------------|-------------------------------|-------------|----------------------------------|
| m1    | 4    | [Al <sub>2</sub> (sq)(ct)(Cl) <sub>2</sub> ] <sup>*+</sup>                | 0.004            | 0.293          | 0.293                   | –                              | –                             | 0.007       | –                                |
| m2    | 4    | [Al <sub>2</sub> (sq)(ct)(H <sub>2</sub> O) <sub>2</sub> ] <sup>*3+</sup> | 0.009            | 0.255          | 0.252                   | 0.003                          | –                             | –           | –                                |
| m3    | 4    | [Al <sub>2</sub> (sq)(ct)(OH) <sub>2</sub> ] <sup>*+</sup>                | 0.021            | 0.253          | 0.254                   | –                              | -0.002                        | –           | –                                |
| m4    | 5    | [Al <sub>2</sub> (sq)(ct)(Cl) <sub>4</sub> ] <sup>*-</sup>                | 0.000            | 0.355          | 0.355                   | –                              | –                             | 0.015       | –                                |
| m5    | 5    | [Al <sub>2</sub> (sq)(ct)(H <sub>2</sub> O) <sub>4</sub> ] <sup>*3+</sup> | 0.005            | 0.285          | 0.284                   | 0.001                          | –                             | –           | –                                |
| m6    | 5    | [Al <sub>2</sub> (sq)(ct)(OH) <sub>4</sub> ] <sup>*-</sup>                | -0.001           | 0.400          | 0.390                   | –                              | 0.010                         | –           | –                                |
| m7    | 6    | [Al <sub>2</sub> (sq)(ct)(Cl) <sub>6</sub> ] <sup>*3-</sup>               | -0.007           | 0.456          | 0.456                   | –                              | –                             | 0.048       | –                                |
| m8    | 6    | [Al <sub>2</sub> (sq)(ct)(H <sub>2</sub> O) <sub>6</sub> ] <sup>*3+</sup> | 0.002            | 0.396          | 0.387                   | 0.009                          | –                             | –           | –                                |
| m9    | 6    | [Al <sub>2</sub> (sq)(ct)(OH) <sub>6</sub> ] <sup>*3-</sup>               | -0.005           | 0.515          | 0.480                   | –                              | 0.036                         | –           | –                                |
| m10   | 6    | [Al <sub>2</sub> (sq)(ct)(Cl) <sub>6</sub> ] <sup>*3-</sup>               | 0.000            | 0.416          | 0.416                   | –                              | –                             | 0.022       | –                                |
| m11   | 6    | [Al <sub>2</sub> (sq)(ct)(H <sub>2</sub> O) <sub>6</sub> ] <sup>*3+</sup> | 0.006            | 0.318          | 0.310                   | 0.008                          | –                             | –           | –                                |
| m12   | 6    | [Al <sub>2</sub> (sq)(ct)(OH) <sub>6</sub> ] <sup>*3-</sup>               | -0.004           | 0.489          | 0.469                   | –                              | 0.020                         | –           | –                                |
| m13   | 6    | [Al <sub>2</sub> (sq)(ct)(Cl) <sub>6</sub> ] <sup>*3-</sup>               | -0.005           | 0.431          | 0.431                   | –                              | –                             | 0.057       | –                                |
| m14   | 6    | [Al <sub>2</sub> (sq)(ct)(H <sub>2</sub> O) <sub>6</sub> ] <sup>*3+</sup> | 0.005            | 0.320          | 0.320                   | 0.000                          | –                             | –           | –                                |
| m15   | 6    | [Al <sub>2</sub> (sq)(ct)(OH) <sub>6</sub> ] <sup>*3-</sup>               | -0.011           | 0.548          | 0.486                   | –                              | 0.063                         | –           | –                                |
| r1    | –    | sq <sup>*-</sup>                                                          | –                | 0.505          | –                       | –                              | –                             | –           | –                                |
| r2    | –    | sq <sup>*-</sup> × 3H <sub>2</sub> O                                      | –                | 0.486          | –                       | –                              | –                             | –           | 0.000                            |
| r3    | –    | sq <sup>*-</sup> × 3EtOH                                                  | –                | 0.483          | –                       | –                              | –                             | –           | 0.000                            |
| r4    | –    | sq <sup>*-</sup> × 3MeOH                                                  | –                | 0.482          | –                       | –                              | –                             | –           | 0.000                            |

**Table S3** Various contributions to the principal components of the g tensor calculated at the UB3LYP/IGLO-III level.

| model | c.n. | composition                                                       | $g_z$                                           | $g_y$    | $g_x$    |          |
|-------|------|-------------------------------------------------------------------|-------------------------------------------------|----------|----------|----------|
| m1    | 4    | $[\text{Al}_2(\text{sq})(\text{ct})(\text{Cl})_2]^{*+}$           | 2.00104                                         | 2.00480  | 2.00491  |          |
|       |      |                                                                   | $g_e$                                           | 2.00232  | 2.00232  | 2.00232  |
|       |      |                                                                   | $\Delta g^{\text{RMC}}$                         | -0.00021 | -0.00021 | -0.00021 |
|       |      |                                                                   | $\Delta g^{\text{DSO}}$                         | 0.00031  | 0.00015  | 0.00035  |
|       |      |                                                                   | $\Delta g^{\text{PSO}}$                         | -0.00138 | 0.00254  | 0.00245  |
|       |      |                                                                   | $\Delta g^{\text{PSO}}$ /1-center/ <i>total</i> | -0.00137 | 0.00242  | 0.00238  |
|       |      |                                                                   | <i>Al atoms</i>                                 | 0.00001  | -0.00005 | -0.00010 |
|       |      |                                                                   | <i>O atoms in sq and ct</i>                     | 0.00000  | 0.00265  | 0.00192  |
|       |      |                                                                   | <i>C atoms</i>                                  | -0.00003 | -0.00020 | 0.00049  |
|       |      |                                                                   | <i>H atoms</i>                                  | 0.00000  | 0.00000  | 0.00000  |
|       |      |                                                                   | <i>Cl atoms</i>                                 | -0.00135 | 0.00001  | 0.00007  |
| m2    | 4    | $[\text{Al}_2(\text{sq})(\text{ct})(\text{H}_2\text{O})_2]^{*3+}$ | 2.00225                                         | 2.00429  | 2.00448  |          |
|       |      |                                                                   | $g_e$                                           | 2.00232  | 2.00232  | 2.00232  |
|       |      |                                                                   | $\Delta g^{\text{RMC}}$                         | -0.00020 | -0.00020 | -0.00020 |
|       |      |                                                                   | $\Delta g^{\text{DSO}}$                         | 0.00028  | 0.00014  | 0.00032  |
|       |      |                                                                   | $\Delta g^{\text{PSO}}$                         | -0.00015 | 0.00203  | 0.00203  |
|       |      |                                                                   | $\Delta g^{\text{PSO}}$ /1-center/ <i>total</i> | -0.00015 | 0.00191  | 0.00190  |
|       |      |                                                                   | <i>Al atoms</i>                                 | 0.00001  | -0.00007 | -0.00011 |
|       |      |                                                                   | <i>O atoms in sq and ct</i>                     | -0.00001 | 0.00219  | 0.00155  |
|       |      |                                                                   | <i>C atoms</i>                                  | -0.00004 | -0.00020 | 0.00048  |
|       |      |                                                                   | <i>H atoms</i>                                  | 0.00000  | 0.00000  | 0.00000  |
|       |      |                                                                   | <i>O atoms in H<sub>2</sub>O</i>                | -0.00011 | 0.00000  | -0.00002 |
| m3    | 4    | $[\text{Al}_2(\text{sq})(\text{ct})(\text{OH})_2]^{*+}$           | 2.00208                                         | 2.00478  | 2.00493  |          |
|       |      |                                                                   | $g_e$                                           | 2.00232  | 2.00232  | 2.00232  |
|       |      |                                                                   | $\Delta g^{\text{RMC}}$                         | -0.00021 | -0.00021 | -0.00021 |
|       |      |                                                                   | $\Delta g^{\text{DSO}}$                         | 0.00027  | 0.00031  | 0.00015  |
|       |      |                                                                   | $\Delta g^{\text{PSO}}$                         | -0.00030 | 0.00236  | 0.00267  |
|       |      |                                                                   | $\Delta g^{\text{PSO}}$ /1-center/ <i>total</i> | -0.00032 | 0.00228  | 0.00256  |
|       |      |                                                                   | <i>Al atoms</i>                                 | 0.00001  | -0.00009 | -0.00005 |
|       |      |                                                                   | <i>O atoms in sq and ct</i>                     | 0.00000  | 0.00190  | 0.00281  |
|       |      |                                                                   | <i>C atoms</i>                                  | -0.00003 | 0.00049  | -0.00019 |
|       |      |                                                                   | <i>H atoms</i>                                  | 0.00000  | 0.00000  | 0.00000  |
|       |      |                                                                   | <i>O atoms in OH</i>                            | -0.00030 | -0.00001 | 0.00000  |

**Table S3** Continued.

| model                            | c.n.    | composition                                                       | $g_z$    | $g_y$    | $g_x$    |
|----------------------------------|---------|-------------------------------------------------------------------|----------|----------|----------|
| m4                               | 5       | $[\text{Al}_2(\text{sq})(\text{ct})(\text{Cl})_4]^{*-}$           | 2.00470  | 2.00475  | 2.00538  |
|                                  |         | $g_e$                                                             | 2.00232  | 2.00232  | 2.00232  |
|                                  |         | $\Delta g^{\text{RMC}}$                                           | -0.00022 | -0.00022 | -0.00022 |
|                                  |         | $\Delta g^{\text{DSO}}$                                           | 0.00032  | 0.00034  | 0.00017  |
|                                  |         | $\Delta g^{\text{PSO}}$                                           | 0.00228  | 0.00231  | 0.00310  |
|                                  |         | $\Delta g^{\text{PSO}}$ /1-center/ <i>total</i>                   | 0.00227  | 0.00232  | 0.00310  |
|                                  |         | <i>Al atoms</i>                                                   | 0.00002  | 0.00000  | -0.00001 |
|                                  |         | <i>O atoms in sq and ct</i>                                       | 0.00014  | 0.00181  | 0.00307  |
|                                  |         | <i>C atoms</i>                                                    | -0.00001 | 0.00032  | 0.00006  |
|                                  |         | <i>H atoms</i>                                                    | 0.00000  | 0.00000  | 0.00000  |
| <i>Cl atoms</i>                  | 0.00213 | 0.00019                                                           | -0.00001 |          |          |
| m5                               | 5       | $[\text{Al}_2(\text{sq})(\text{ct})(\text{H}_2\text{O})_4]^{*3+}$ | 2.00246  | 2.00439  | 2.00485  |
|                                  |         | $g_e$                                                             | 2.00232  | 2.00232  | 2.00232  |
|                                  |         | $\Delta g^{\text{RMC}}$                                           | -0.00020 | -0.00020 | -0.00020 |
|                                  |         | $\Delta g^{\text{DSO}}$                                           | 0.00028  | 0.00032  | 0.00016  |
|                                  |         | $\Delta g^{\text{PSO}}$                                           | 0.00006  | 0.00196  | 0.00258  |
|                                  |         | $\Delta g^{\text{PSO}}$ /1-center/ <i>total</i>                   | 0.00006  | 0.00198  | 0.00240  |
|                                  |         | <i>Al atoms</i>                                                   | 0.00001  | -0.00001 | -0.00001 |
|                                  |         | <i>O atoms in sq and ct</i>                                       | 0.00000  | 0.00170  | 0.00239  |
|                                  |         | <i>C atoms</i>                                                    | -0.00003 | 0.00030  | 0.00002  |
|                                  |         | <i>H atoms</i>                                                    | 0.00000  | 0.00000  | 0.00000  |
| <i>O atoms in H<sub>2</sub>O</i> | 0.00008 | 0.00000                                                           | 0.00001  |          |          |
| m6                               | 5       | $[\text{Al}_2(\text{sq})(\text{ct})(\text{OH})_4]^{*-}$           | 2.00263  | 2.00491  | 2.00587  |
|                                  |         | $g_e$                                                             | 2.00232  | 2.00232  | 2.00232  |
|                                  |         | $\Delta g^{\text{RMC}}$                                           | -0.00022 | -0.00022 | -0.00022 |
|                                  |         | $\Delta g^{\text{DSO}}$                                           | 0.00027  | 0.00028  | 0.00019  |
|                                  |         | $\Delta g^{\text{PSO}}$                                           | 0.00027  | 0.00254  | 0.00358  |
|                                  |         | $\Delta g^{\text{PSO}}$ /1-center/ <i>total</i>                   | 0.00026  | 0.00252  | 0.00349  |
|                                  |         | <i>Al atoms</i>                                                   | 0.00002  | 0.00000  | 0.00000  |
|                                  |         | <i>O atoms in sq and ct</i>                                       | 0.00001  | 0.00201  | 0.00363  |
|                                  |         | <i>C atoms</i>                                                    | -0.00002 | 0.00046  | -0.00014 |
|                                  |         | <i>H atoms</i>                                                    | 0.00000  | 0.00000  | 0.00000  |
| <i>O atoms in OH</i>             | 0.00026 | 0.00005                                                           | -0.00001 |          |          |



**Table S3** Continued.

| model | c.n. | composition                                                       | $g_z$    | $g_y$    | $g_x$    |
|-------|------|-------------------------------------------------------------------|----------|----------|----------|
| m7    | 6    | $[\text{Al}_2(\text{sq})(\text{ct})(\text{Cl})_6]^{*3-}$          | 2.00012  | 2.00546  | 2.01021  |
|       |      | $g_e$                                                             | 2.00232  | 2.00232  | 2.00232  |
|       |      | $\Delta g^{\text{RMC}}$                                           | -0.00024 | -0.00024 | -0.00024 |
|       |      | $\Delta g^{\text{DSO}}$                                           | 0.00042  | 0.00020  | 0.00045  |
|       |      | $\Delta g^{\text{PSO}}$                                           | -0.00238 | 0.00319  | 0.00768  |
|       |      | $\Delta g^{\text{PSO}}$ /1-center/ <i>total</i>                   | -0.00237 | 0.00306  | 0.00771  |
|       |      | <i>Al atoms</i>                                                   | 0.00002  | -0.00001 | -0.00001 |
|       |      | <i>O atoms in sq and ct</i>                                       | 0.00002  | 0.00453  | 0.00254  |
|       |      | <i>C atoms</i>                                                    | -0.00002 | -0.00018 | 0.00038  |
|       |      | <i>H atoms</i>                                                    | 0.00000  | 0.00000  | 0.00000  |
|       |      | <i>Cl atoms</i>                                                   | -0.00238 | -0.00128 | 0.00480  |
| m8    | 6    | $[\text{Al}_2(\text{sq})(\text{ct})(\text{H}_2\text{O})_6]^{*3+}$ | 2.00230  | 2.00520  | 2.00641  |
|       |      | $g_e$                                                             | 2.00232  | 2.00232  | 2.00232  |
|       |      | $\Delta g^{\text{RMC}}$                                           | -0.00022 | -0.00022 | -0.00022 |
|       |      | $\Delta g^{\text{DSO}}$                                           | 0.00034  | 0.00037  | 0.00016  |
|       |      | $\Delta g^{\text{PSO}}$                                           | -0.00014 | 0.00273  | 0.00415  |
|       |      | $\Delta g^{\text{PSO}}$ /1-center/ <i>total</i>                   | -0.00015 | 0.00269  | 0.00403  |
|       |      | <i>Al atoms</i>                                                   | 0.00001  | -0.00005 | -0.00006 |
|       |      | <i>O atoms in sq and ct</i>                                       | 0.00001  | 0.00220  | 0.00434  |
|       |      | <i>C atoms</i>                                                    | -0.00003 | 0.00045  | -0.00017 |
|       |      | <i>H atoms</i>                                                    | 0.00000  | 0.00000  | 0.00000  |
|       |      | <i>O atoms in H<sub>2</sub>O</i>                                  | -0.00014 | 0.00008  | -0.00008 |
| m9    | 6    | $[\text{Al}_2(\text{sq})(\text{ct})(\text{OH})_6]^{*3-}$          | 2.00186  | 2.00586  | 2.00676  |
|       |      | $g_e$                                                             | 2.00232  | 2.00232  | 2.00232  |
|       |      | $\Delta g^{\text{RMC}}$                                           | -0.00024 | -0.00024 | -0.00024 |
|       |      | $\Delta g^{\text{DSO}}$                                           | 0.00032  | 0.00035  | 0.00018  |
|       |      | $\Delta g^{\text{PSO}}$                                           | -0.00054 | 0.00343  | 0.00449  |
|       |      | $\Delta g^{\text{PSO}}$ /1-center/ <i>total</i>                   | -0.00100 | 0.00350  | 0.00437  |
|       |      | <i>Al atoms</i>                                                   | 0.00001  | 0.00001  | 0.00001  |
|       |      | <i>O atoms in sq and ct</i>                                       | 0.00001  | 0.00273  | 0.00472  |
|       |      | <i>C atoms</i>                                                    | -0.00003 | 0.00041  | -0.00016 |
|       |      | <i>H atoms</i>                                                    | 0.00000  | 0.00000  | 0.00000  |
|       |      | <i>O atoms in OH</i>                                              | -0.00099 | 0.00035  | -0.00020 |

**Table S3** Continued.

| model | c.n. | composition                                                       | $g_z$    | $g_y$    | $g_x$    |
|-------|------|-------------------------------------------------------------------|----------|----------|----------|
| m10   | 6    | $[\text{Al}_2(\text{sq})(\text{ct})(\text{Cl})_6]^{+3-}$          | 2.00175  | 2.00613  | 2.00661  |
|       |      | $g_e$                                                             | 2.00232  | 2.00232  | 2.00232  |
|       |      | $\Delta g^{\text{RMC}}$                                           | -0.00023 | -0.00023 | -0.00023 |
|       |      | $\Delta g^{\text{DSO}}$                                           | 0.00033  | 0.00022  | 0.00037  |
|       |      | $\Delta g^{\text{PSO}}$                                           | -0.00067 | 0.00381  | 0.00414  |
|       |      | $\Delta g^{\text{PSO}}$ /1-center/ <i>total</i>                   | -0.00066 | 0.00373  | 0.00406  |
|       |      | <i>Al atoms</i>                                                   | 0.00000  | -0.00005 | -0.00003 |
|       |      | <i>O atoms in sq and ct</i>                                       | 0.00001  | 0.00395  | 0.00199  |
|       |      | <i>C atoms</i>                                                    | -0.00002 | -0.00015 | 0.00040  |
|       |      | <i>H atoms</i>                                                    | 0.00000  | 0.00000  | 0.00000  |
|       |      | <i>Cl atoms</i>                                                   | -0.00065 | -0.00002 | 0.00170  |
| m11   | 6    | $[\text{Al}_2(\text{sq})(\text{ct})(\text{H}_2\text{O})_6]^{+3+}$ | 2.00232  | 2.00489  | 2.00505  |
|       |      | $g_e$                                                             | 2.00232  | 2.00232  | 2.00232  |
|       |      | $\Delta g^{\text{RMC}}$                                           | -0.00021 | -0.00021 | -0.00021 |
|       |      | $\Delta g^{\text{DSO}}$                                           | 0.00030  | 0.00033  | 0.00018  |
|       |      | $\Delta g^{\text{PSO}}$                                           | -0.00009 | 0.00245  | 0.00275  |
|       |      | $\Delta g^{\text{PSO}}$ /1-center/ <i>total</i>                   | -0.00009 | 0.00228  | 0.00265  |
|       |      | <i>Al atoms</i>                                                   | -0.00001 | -0.00008 | -0.00010 |
|       |      | <i>O atoms in sq and ct</i>                                       | -0.00001 | 0.00185  | 0.00297  |
|       |      | <i>C atoms</i>                                                    | -0.00003 | 0.00043  | -0.00018 |
|       |      | <i>H atoms</i>                                                    | 0.00000  | 0.00000  | 0.00000  |
|       |      | <i>O atoms in H<sub>2</sub>O</i>                                  | -0.00004 | 0.00008  | -0.00005 |
| m12   | 6    | $[\text{Al}_2(\text{sq})(\text{ct})(\text{OH})_6]^{+3-}$          | 2.00215  | 2.00559  | 2.00694  |
|       |      | $g_e$                                                             | 2.00232  | 2.00232  | 2.00232  |
|       |      | $\Delta g^{\text{RMC}}$                                           | -0.00023 | -0.00023 | -0.00023 |
|       |      | $\Delta g^{\text{DSO}}$                                           | 0.00029  | 0.00032  | 0.00020  |
|       |      | $\Delta g^{\text{PSO}}$                                           | -0.00023 | 0.00319  | 0.00466  |
|       |      | $\Delta g^{\text{PSO}}$ /1-center/ <i>total</i>                   | -0.00022 | 0.00322  | 0.00460  |
|       |      | <i>Al atoms</i>                                                   | 0.00000  | 0.00001  | 0.00000  |
|       |      | <i>O atoms in sq and ct</i>                                       | 0.00002  | 0.00263  | 0.00469  |
|       |      | <i>C atoms</i>                                                    | -0.00002 | 0.00042  | -0.00014 |
|       |      | <i>H atoms</i>                                                    | 0.00000  | 0.00000  | 0.00000  |
|       |      | <i>O atoms in OH</i>                                              | -0.00023 | 0.00016  | 0.00004  |

**Table S3** Continued.

| model | c.n. | composition                                                       | $g_z$    | $g_y$    | $g_x$    |
|-------|------|-------------------------------------------------------------------|----------|----------|----------|
| m13   | 6    | $[\text{Al}_2(\text{sq})(\text{ct})(\text{Cl})_6]^{+3-}$          | 2.00277  | 2.00764  | 2.00788  |
|       |      | $g_e$                                                             | 2.00232  | 2.00232  | 2.00232  |
|       |      | $\Delta g^{\text{RMC}}$                                           | -0.00024 | -0.00024 | -0.00024 |
|       |      | $\Delta g^{\text{DSO}}$                                           | 0.00035  | 0.00024  | 0.00034  |
|       |      | $\Delta g^{\text{PSO}}$                                           | 0.00034  | 0.00532  | 0.00545  |
|       |      | $\Delta g^{\text{PSO}} / 1\text{-center/}$ <i>total</i>           | 0.00024  | 0.00520  | 0.00553  |
|       |      | <i>Al atoms</i>                                                   | 0.00001  | 0.00000  | 0.00002  |
|       |      | <i>O atoms in sq and ct</i>                                       | 0.00001  | 0.00264  | 0.00305  |
|       |      | <i>C atoms</i>                                                    | -0.00002 | 0.00036  | -0.00003 |
|       |      | <i>H atoms</i>                                                    | 0.00000  | 0.00000  | 0.00000  |
|       |      | <i>Cl atoms</i>                                                   | 0.00024  | 0.00220  | 0.00249  |
| m14   | 6    | $[\text{Al}_2(\text{sq})(\text{ct})(\text{H}_2\text{O})_6]^{+3+}$ | 2.00237  | 2.00462  | 2.00515  |
|       |      | $g_e$                                                             | 2.00232  | 2.00232  | 2.00232  |
|       |      | $\Delta g^{\text{RMC}}$                                           | -0.00021 | -0.00021 | -0.00021 |
|       |      | $\Delta g^{\text{DSO}}$                                           | 0.00031  | 0.00034  | 0.00016  |
|       |      | $\Delta g^{\text{PSO}}$                                           | -0.00005 | 0.00217  | 0.00287  |
|       |      | $\Delta g^{\text{PSO}} / 1\text{-center/}$ <i>total</i>           | -0.00005 | 0.00224  | 0.00264  |
|       |      | <i>Al atoms</i>                                                   | 0.00001  | -0.00001 | 0.00000  |
|       |      | <i>O atoms in sq and ct</i>                                       | 0.00000  | 0.00189  | 0.00268  |
|       |      | <i>C atoms</i>                                                    | -0.00003 | 0.00034  | -0.00004 |
|       |      | <i>H atoms</i>                                                    | 0.00000  | 0.00000  | 0.00000  |
|       |      | <i>O atoms in H<sub>2</sub>O</i>                                  | -0.00004 | 0.00002  | 0.00000  |
| m15   | 6    | $[\text{Al}_2(\text{sq})(\text{ct})(\text{OH})_6]^{+3-}$          | 2.00246  | 2.00561  | 2.00706  |
|       |      | $g_e$                                                             | 2.00232  | 2.00232  | 2.00232  |
|       |      | $\Delta g^{\text{RMC}}$                                           | -0.00025 | -0.00025 | -0.00025 |
|       |      | $\Delta g^{\text{DSO}}$                                           | 0.00028  | 0.00027  | 0.00024  |
|       |      | $\Delta g^{\text{PSO}}$                                           | -0.00019 | 0.00359  | 0.00459  |
|       |      | $\Delta g^{\text{PSO}} / 1\text{-center/}$ <i>total</i>           | 0.00013  | 0.00316  | 0.00465  |
|       |      | <i>Al atoms</i>                                                   | 0.00001  | 0.00002  | 0.00001  |
|       |      | <i>O atoms in sq and ct</i>                                       | 0.00004  | 0.00246  | 0.00451  |
|       |      | <i>C atoms</i>                                                    | -0.00002 | 0.00040  | -0.00013 |
|       |      | <i>H atoms</i>                                                    | 0.00000  | 0.00000  | 0.00000  |
|       |      | <i>O atoms in OH</i>                                              | 0.00010  | 0.00027  | 0.00026  |

Table S3 Continued.

| model | c.n. | composition                          |                                                 | $g_z$    | $g_y$    | $g_x$    |
|-------|------|--------------------------------------|-------------------------------------------------|----------|----------|----------|
| r1    | –    | sq <sup>4-</sup>                     |                                                 | 2.00219  | 2.00620  | 2.00703  |
|       |      |                                      | $g_e$                                           | 2.00232  | 2.00232  | 2.00232  |
|       |      |                                      | $\Delta g^{\text{RMC}}$                         | -0.00023 | -0.00023 | -0.00023 |
|       |      |                                      | $\Delta g^{\text{DSO}}$                         | 0.00013  | 0.00018  | 0.00015  |
|       |      |                                      | $\Delta g^{\text{PSO}}$                         | -0.00003 | 0.00393  | 0.00479  |
|       |      |                                      | $\Delta g^{\text{PSO}}$ /1-center/ <i>total</i> | -0.00001 | 0.00380  | 0.00466  |
|       |      |                                      | <i>O atoms in sq</i>                            | -0.00001 | 0.00354  | 0.00485  |
|       |      |                                      | <i>C atoms</i>                                  | 0.00000  | 0.00026  | -0.00019 |
|       |      | <i>H atoms</i>                       | 0.00000                                         | 0.00000  | 0.00000  |          |
| r2    | –    | sq <sup>4-</sup> × 3H <sub>2</sub> O |                                                 | 2.00220  | 2.00583  | 2.00637  |
|       |      |                                      | $g_e$                                           | 2.00232  | 2.00232  | 2.00232  |
|       |      |                                      | $\Delta g^{\text{RMC}}$                         | -0.00023 | -0.00023 | -0.00023 |
|       |      |                                      | $\Delta g^{\text{DSO}}$                         | 0.00012  | 0.00017  | 0.00015  |
|       |      |                                      | $\Delta g^{\text{PSO}}$                         | -0.00001 | 0.00358  | 0.00413  |
|       |      |                                      | $\Delta g^{\text{PSO}}$ /1-center/ <i>total</i> | 0.00000  | 0.00345  | 0.00407  |
|       |      |                                      | <i>O atoms in sq</i>                            | -0.00001 | 0.00328  | 0.00419  |
|       |      |                                      | <i>C atoms</i>                                  | -0.00001 | 0.00021  | -0.00010 |
|       |      | <i>H atoms</i>                       | 0.00000                                         | 0.00000  | 0.00000  |          |
|       |      | <i>O atoms in H<sub>2</sub>O</i>     | 0.00001                                         | -0.00004 | -0.00002 |          |
| r3    | –    | sq <sup>4-</sup> × 3EtOH             |                                                 | 2.00224  | 2.00587  | 2.00650  |
|       |      |                                      | $g_e$                                           | 2.00232  | 2.00232  | 2.00232  |
|       |      |                                      | $\Delta g^{\text{RMC}}$                         | -0.00023 | -0.00023 | -0.00023 |
|       |      |                                      | $\Delta g^{\text{DSO}}$                         | 0.00013  | 0.00018  | 0.00015  |
|       |      |                                      | $\Delta g^{\text{PSO}}$                         | 0.00002  | 0.00360  | 0.00426  |
|       |      |                                      | $\Delta g^{\text{PSO}}$ /1-center/ <i>total</i> | 0.00003  | 0.00350  | 0.00422  |
|       |      |                                      | <i>O atoms in sq</i>                            | 0.00000  | 0.00327  | 0.00434  |
|       |      |                                      | <i>C atoms</i>                                  | -0.00001 | 0.00025  | -0.00010 |
|       |      | <i>H atoms</i>                       | 0.00000                                         | 0.00000  | 0.00000  |          |
|       |      | <i>O atoms in EtOH</i>               | 0.00004                                         | -0.00002 | -0.00002 |          |
| r4    | –    | sq <sup>4-</sup> × 3MeOH             |                                                 | 2.00224  | 2.00587  | 2.00649  |
|       |      |                                      | $g_e$                                           | 2.00232  | 2.00232  | 2.00232  |
|       |      |                                      | $\Delta g^{\text{RMC}}$                         | -0.00023 | -0.00023 | -0.00023 |
|       |      |                                      | $\Delta g^{\text{DSO}}$                         | 0.00012  | 0.00017  | 0.00015  |
|       |      |                                      | $\Delta g^{\text{PSO}}$                         | 0.00002  | 0.00360  | 0.00425  |
|       |      |                                      | $\Delta g^{\text{PSO}}$ /1-center/ <i>total</i> | 0.00003  | 0.00348  | 0.00419  |
|       |      |                                      | <i>O atoms in sq</i>                            | 0.00000  | 0.00327  | 0.00432  |
|       |      |                                      | <i>C atoms</i>                                  | -0.00001 | 0.00023  | -0.00011 |
|       |      | <i>H atoms</i>                       | 0.00000                                         | 0.00000  | 0.00000  |          |
|       |      | <i>O atoms in MeOH</i>               | 0.00004                                         | -0.00002 | -0.00003 |          |

**Table S4** The isotropic hyperfine coupling constant due to  $^{27}\text{Al}$  ( $a_{\text{Al}}$ ) calculated at the DFT and DLPNO-CCSD level. The values are given in MHz.

| model      | c.n. | composition                                                       | basis set | B3LYP     | PBE0      | TPSS0     | wB97X     | B2PLYP    | mPW2PLYP  | DSD-BLYP  | DLPNO-CCSD |
|------------|------|-------------------------------------------------------------------|-----------|-----------|-----------|-----------|-----------|-----------|-----------|-----------|------------|
| <b>m1</b>  | 4    | $[\text{Al}_2(\text{sq})(\text{ct})(\text{Cl})_2]^{*+}$           | IGLO-II   | -8.28     | -8.39     | -7.13     | -6.17     | -8.29     | -8.64     | -6.58     | -9.27      |
|            |      |                                                                   | IGLO-III  | -7.84     | -7.98     | -6.80     | -5.79     | -7.78     | -8.13     | -6.13     | –          |
| <b>m2</b>  | 4    | $[\text{Al}_2(\text{sq})(\text{ct})(\text{H}_2\text{O})_2]^{*3+}$ | IGLO-II   | -8.21     | -5.94     | -4.58     | -6.44     | -6.10     | -6.32     | -6.45     | -4.49      |
|            |      |                                                                   | IGLO-III  | -7.26     | -5.51     | -4.26     | -6.13     | -5.66     | -5.89     | -6.07     | –          |
| <b>m3</b>  | 4    | $[\text{Al}_2(\text{sq})(\text{ct})(\text{OH})_2]^{*+}$           | IGLO-II   | -7.68     | -7.71     | -6.75     | -6.03     | -5.80     | -5.99     | -6.22     | -0.22      |
|            |      |                                                                   | IGLO-III  | -7.14     | -7.17     | -6.29     | -5.60     | -5.39     | -5.57     | -5.73     | –          |
| <b>m4</b>  | 5    | $[\text{Al}_2(\text{sq})(\text{ct})(\text{Cl})_4]^{*-}$           | IGLO-II   | -6.61     | -6.75     | -5.82     | -6.28     | -5.93     | -6.00     | -5.53     | -6.66      |
|            |      |                                                                   | IGLO-III  | -6.27     | -6.41     | -5.52     | -5.84     | -5.61     | -5.72     | -5.24     | –          |
| <b>m5</b>  | 5    | $[\text{Al}_2(\text{sq})(\text{ct})(\text{H}_2\text{O})_4]^{*3+}$ | IGLO-II   | -5.38     | -4.87     | -4.09     | -4.53     | -4.39     | -4.48     | -4.04     | -3.21      |
|            |      |                                                                   | IGLO-III  | -5.12     | -4.47     | -3.82     | -4.24     | -4.15     | -4.24     | -3.80     | –          |
| <b>m6</b>  | 5    | $[\text{Al}_2(\text{sq})(\text{ct})(\text{OH})_4]^{*-}$           | IGLO-II   | -5.98     | -6.18     | -5.46     | -5.80     | -5.67     | -5.72     | -5.17     | -7.07      |
|            |      |                                                                   | IGLO-III  | -5.63     | -5.70     | -5.02     | -5.30     | -5.26     | -5.32     | -4.85     | –          |
| <b>m7</b>  | 6    | $[\text{Al}_2(\text{sq})(\text{ct})(\text{Cl})_6]^{*3-}$          | IGLO-II   | -9.89     | -9.18     | -7.92     | -9.34     | -8.79     | -8.92     | -10.15    | -11.14     |
|            |      |                                                                   | IGLO-III  | -9.22     | -8.48     | -7.31     | -8.56     | -8.19     | -8.29     | -9.35     | –          |
| <b>m8</b>  | 6    | $[\text{Al}_2(\text{sq})(\text{ct})(\text{H}_2\text{O})_6]^{*3+}$ | IGLO-II   | -7.19     | -6.35     | -5.56     | -6.55     | -7.11     | -7.11     | -7.15     | -6.56      |
|            |      |                                                                   | IGLO-III  | -5.78     | -5.92     | -5.20     | -6.05     | -6.59     | -6.59     | -6.67     | –          |
| <b>m9</b>  | 6    | $[\text{Al}_2(\text{sq})(\text{ct})(\text{OH})_6]^{*3-}$          | IGLO-II   | -9.06     | -6.36     | -5.62     | -5.99     | -5.62     | -5.71     | -6.06     | -7.50      |
|            |      |                                                                   | IGLO-III  | -8.04     | -5.70     | -5.05     | -5.37     | -5.12     | -5.20     | -5.59     | –          |
| <b>m10</b> | 6    | $[\text{Al}_2(\text{sq})(\text{ct})(\text{Cl})_6]^{*3-}$          | IGLO-II   | -7.18     | -6.36     | -5.37     | -6.57     | -6.12     | -6.29     | -6.40     | -6.44      |
|            |      |                                                                   | IGLO-III  | -6.73     | -5.97     | -5.03     | -6.08     | -5.77     | -5.92     | -6.09     | –          |
| <b>m11</b> | 6    | $[\text{Al}_2(\text{sq})(\text{ct})(\text{H}_2\text{O})_6]^{3+}$  | IGLO-II   | -6.57     | -5.88     | -4.87     | -6.00     | -6.06     | -6.17     | -6.79     | -4.99      |
|            |      |                                                                   | IGLO-III  | -6.03     | -5.53     | -4.60     | -5.69     | -5.74     | -5.83     | -6.34     | –          |
| <b>m12</b> | 6    | $[\text{Al}_2(\text{sq})(\text{ct})(\text{OH})_6]^{*3-}$          | IGLO-II   | -5.35     | -4.90     | -4.32     | -4.69     | -4.31     | -4.41     | -4.76     | -4.80      |
|            |      |                                                                   | IGLO-III  | -4.79     | -4.47     | -3.93     | -4.28     | -3.97     | -4.81     | -4.37     | –          |
| <b>m13</b> | 6    | $[\text{Al}_2(\text{sq})(\text{ct})(\text{Cl})_6]^{*3-}$          | IGLO-II   | -8.25     | -8.43     | -7.43     | -8.99     | -8.26     | -8.37     | -7.74     | -7.15      |
|            |      |                                                                   | IGLO-III  | -7.72     | -7.97     | -6.93     | -8.25     | -7.70     | -7.79     | -7.27     | –          |
| <b>m14</b> | 6    | $[\text{Al}_2(\text{sq})(\text{ct})(\text{H}_2\text{O})_6]^{*3+}$ | IGLO-II   | -6.97     | -6.96     | -6.21     | -6.21     | -5.97     | -6.09     | -5.67     | -6.60      |
|            |      |                                                                   | IGLO-III  | -6.61     | -6.61     | -5.91     | -5.78     | -5.61     | -5.72     | -5.33     | –          |
| <b>m15</b> | 6    | $[\text{Al}_2(\text{sq})(\text{ct})(\text{OH})_6]^{*3-}$          | IGLO-II   | -6.81     | -7.00     | -6.01     | -6.56     | -6.16     | -6.24     | -6.30     | -5.39      |
|            |      |                                                                   | IGLO-III  | -6.20     | -6.28     | -5.47     | -5.90     | -5.61     | -5.69     | -5.72     | –          |
|            |      | <b>experimental for complex 1</b>                                 |           | $\pm 2.5$  |

**Table S4** The isotropic hyperfine coupling constant due to <sup>1</sup>H calculated at the DFT and DLPNO-CCSD level. The values are given in MHz.

| model                                       | basis set | B3LYP      |             | PBE0       |             | TPSS0      |             | wB97X      |             | B2PLYP     |             | mPW2PLYP   |             | DSD-BLYP   |             | DLPNO-CCSD |             |
|---------------------------------------------|-----------|------------|-------------|------------|-------------|------------|-------------|------------|-------------|------------|-------------|------------|-------------|------------|-------------|------------|-------------|
|                                             |           | H1         | H2          |
| m1                                          | IGLO-II   | -0.51      | -0.90       | -0.81      | -1.05       | -0.85      | -1.16       | -0.91      | -1.05       | -0.25      | -0.95       | -0.42      | -1.00       | -0.32      | -1.06       | -0.79      | -1.14       |
|                                             | IGLO-III  | -0.43      | -0.86       | -0.66      | -1.00       | -0.64      | -1.06       | -0.73      | -0.93       | -0.06      | -0.88       | -0.23      | -0.92       | -0.28      | -1.00       | –          | –           |
| m2                                          | IGLO-II   | -0.54      | -1.13       | -0.93      | -1.33       | -1.08      | -1.41       | -0.98      | -1.42       | -0.22      | -1.02       | -0.46      | -1.13       | -0.28      | -0.91       | -0.90      | -0.99       |
|                                             | IGLO-III  | -0.43      | -0.86       | -0.77      | -0.86       | -0.72      | -1.20       | -0.87      | -0.96       | -0.01      | -0.99       | -0.23      | -1.12       | -0.38      | -0.85       | –          | –           |
| m3                                          | IGLO-II   | -0.37      | -0.73       | -0.55      | -0.82       | -0.61      | -0.98       | -0.66      | -0.89       | -0.15      | -0.80       | -0.30      | -0.82       | -0.19      | -0.87       | -0.53      | -0.90       |
|                                             | IGLO-III  | -0.26      | -0.72       | -0.49      | -0.85       | -0.39      | -0.89       | -0.48      | -0.74       | 0.02       | -0.69       | -0.12      | -0.78       | -0.15      | -0.78       | –          | –           |
| m4                                          | IGLO-II   | -0.42      | -1.03       | -0.69      | -1.16       | -0.76      | -1.32       | -0.88      | -1.15       | -0.16      | -1.10       | -0.35      | -1.11       | -0.31      | -1.21       | -0.71      | -1.27       |
|                                             | IGLO-III  | -0.43      | -1.01       | -0.57      | -1.10       | -0.56      | -1.17       | -0.72      | -1.02       | -0.02      | -1.06       | -0.15      | -1.01       | -0.24      | -1.15       | –          | –           |
| m5                                          | IGLO-II   | -0.45      | -0.90       | -0.56      | -0.91       | -0.62      | -1.01       | -0.73      | -1.04       | -0.14      | -0.89       | -0.26      | -1.05       | -0.24      | -1.18       | -0.57      | -1.13       |
|                                             | IGLO-III  | -0.62      | -0.99       | -0.96      | -1.19       | -0.95      | -0.95       | -0.83      | -1.04       | 0.05       | -1.12       | -0.21      | -1.28       | -0.25      | -1.08       | –          | –           |
| m6                                          | IGLO-II   | -0.37      | -0.75       | -0.57      | -0.99       | -0.67      | -1.01       | -0.70      | -0.97       | -0.12      | -0.90       | -0.25      | -0.88       | -0.23      | -0.92       | -0.62      | -1.02       |
|                                             | IGLO-III  | -0.34      | -0.77       | -0.50      | -0.91       | -0.52      | -0.96       | -0.50      | -0.84       | -0.05      | -0.80       | -0.15      | -0.81       | -0.21      | -0.91       | –          | –           |
| m7                                          | IGLO-II   | -0.49      | -0.72       | -0.76      | -0.81       | -0.80      | -0.92       | -0.84      | -0.86       | -0.22      | -0.82       | -0.41      | -0.86       | -0.25      | -0.83       | -0.74      | -0.96       |
|                                             | IGLO-III  | -0.38      | -0.67       | -0.65      | -0.78       | -0.59      | -0.88       | -0.66      | -0.73       | -0.06      | -0.77       | -0.16      | -0.75       | -0.22      | -0.78       | –          | –           |
| m8                                          | IGLO-II   | -0.47      | -0.80       | -0.83      | -1.01       | -0.84      | -1.22       | -0.87      | -1.26       | -0.21      | -1.27       | -0.33      | -0.94       | -0.34      | -1.00       | -0.82      | -1.05       |
|                                             | IGLO-III  | -0.28      | -0.77       | -0.71      | -1.22       | -0.51      | -1.02       | -0.74      | -1.14       | -0.08      | -1.21       | -0.23      | -1.15       | -0.25      | -1.20       | –          | –           |
| m9                                          | IGLO-II   | -0.39      | -0.60       | -0.53      | -0.69       | -0.58      | -0.78       | -0.67      | -0.72       | -0.14      | -0.65       | -0.22      | -0.69       | -0.20      | -0.74       | -0.53      | -0.75       |
|                                             | IGLO-III  | -0.30      | -0.62       | -0.46      | -0.68       | -0.48      | -0.69       | -0.50      | -0.62       | -0.07      | -0.61       | -0.15      | -0.61       | -0.22      | -0.67       | –          | –           |
| m10                                         | IGLO-II   | -0.54      | -0.95       | -0.80      | -1.15       | -0.89      | -1.26       | -0.89      | -1.16       | -0.21      | -1.04       | -0.38      | -1.05       | -0.30      | -1.12       | -0.79      | -1.24       |
|                                             | IGLO-III  | -0.38      | -0.91       | -0.63      | -1.02       | -0.62      | -1.12       | -0.74      | -1.04       | -0.03      | -0.96       | -0.22      | -1.06       | -0.28      | -1.02       | –          | –           |
| m11                                         | IGLO-II   | -0.55      | -1.01       | -0.79      | -1.41       | -1.00      | -1.36       | -0.92      | -1.43       | -0.17      | -1.19       | -0.47      | -1.29       | -0.37      | -1.30       | -0.82      | -1.41       |
|                                             | IGLO-III  | -0.48      | -0.99       | -0.68      | -1.29       | -0.78      | -1.50       | -0.73      | -1.10       | 0.05       | -0.99       | -0.25      | -1.26       | -0.32      | -1.35       | –          | –           |
| m12                                         | IGLO-II   | -0.33      | -0.56       | -0.47      | -0.67       | -0.59      | -0.77       | -0.56      | -0.66       | -0.16      | -0.65       | -0.28      | -0.63       | -0.16      | -0.71       | -0.49      | -0.78       |
|                                             | IGLO-III  | -0.26      | -0.60       | -0.40      | -0.64       | -0.38      | -0.68       | -0.47      | -0.63       | -0.01      | -0.60       | -0.13      | -0.63       | -0.13      | -0.65       | –          | –           |
| m13                                         | IGLO-II   | -0.48      | -0.95       | -0.78      | -1.13       | -0.79      | -1.23       | -0.92      | -1.05       | -0.17      | -1.00       | -0.34      | -1.09       | -0.26      | -1.07       | -0.82      | -1.17       |
|                                             | IGLO-III  | -0.41      | -0.92       | -0.66      | -0.98       | -0.62      | -1.13       | -0.69      | -1.02       | -0.08      | -0.90       | -0.20      | -1.01       | -0.22      | -1.06       | –          | –           |
| m14                                         | IGLO-II   | -0.62      | -1.17       | -0.79      | -1.26       | -0.90      | -1.57       | -1.02      | -1.29       | -0.14      | -1.06       | -0.52      | -1.18       | -0.26      | -1.16       | -1.00      | -1.28       |
|                                             | IGLO-III  | -0.23      | -0.36       | -0.26      | -0.43       | -0.24      | -0.39       | -0.33      | -0.38       | 0.00       | -0.30       | -0.06      | -0.35       | -0.08      | -0.33       | –          | –           |
| m15                                         | IGLO-II   | -0.36      | -0.61       | -0.58      | -0.64       | -0.63      | -0.77       | -0.61      | -0.65       | -0.10      | -0.57       | -0.25      | -0.67       | -0.20      | -0.67       | -0.55      | -0.76       |
|                                             | IGLO-III  | -0.25      | -0.56       | -0.44      | -0.64       | -0.41      | -0.66       | -0.50      | -0.62       | -0.06      | -0.60       | -0.10      | -0.65       | -0.18      | -0.60       | –          | –           |
| r1                                          | IGLO-II   | -4.55      | -8.06       | -4.68      | -8.54       | -4.99      | -9.21       | -4.55      | -8.13       | -4.92      | -9.37       | -4.79      | -9.37       | -4.93      | -10.31      | -3.19      | -9.86       |
|                                             | IGLO-III  | -3.61      | -8.12       | -3.61      | -8.64       | -3.99      | -9.05       | -3.47      | -7.83       | -4.02      | -9.31       | -3.87      | -9.33       | -4.80      | -10.29      | –          | –           |
| r2                                          | IGLO-II   | -2.94      | -8.56       | -2.83      | -9.17       | -3.08      | -9.96       | -2.60      | -8.79       | -3.47      | -9.65       | -3.22      | -9.75       | -2.52      | -10.97      | -1.95      | -10.28      |
|                                             | IGLO-III  | -2.42      | -8.53       | -2.23      | -9.15       | -2.59      | -9.65       | -2.05      | -8.37       | -3.04      | -9.49       | -2.79      | -9.60       | -2.07      | -10.87      | –          | –           |
| r3                                          | IGLO-II   | -3.15      | -8.51       | -3.07      | -9.10       | -3.37      | -9.85       | -2.85      | -8.72       | -3.58      | -9.72       | -3.35      | -9.80       | -2.48      | -10.65      | -2.25      | -10.28      |
|                                             | IGLO-III  | -2.68      | -8.44       | -2.51      | -9.05       | -2.90      | -9.52       | -2.33      | -8.26       | -3.18      | -9.54       | -2.96      | -9.63       | -2.27      | -10.64      | –          | –           |
| r4                                          | IGLO-II   | -3.09      | -8.53       | -3.01      | -9.13       | -3.30      | -9.89       | -2.79      | -8.75       | -3.53      | -9.73       | -3.30      | -9.82       | -2.26      | -10.75      | -2.22      | -10.29      |
|                                             | IGLO-III  | -2.61      | -8.47       | -2.45      | -9.09       | -2.83      | -9.56       | -2.27      | -8.29       | -3.14      | -9.56       | -2.91      | -9.65       | -2.16      | -10.71      | –          | –           |
| <i>experimental for uncomplexed radical</i> |           | <b>2.1</b> | <b>10.3</b> |

**Table S5** The principal components of the g tensors calculated at the DFT level for the S = 1 counterparts of **m2**, **m5**, **m8**, **m11** and **m14**.

| model                               | c.n. | composition                    | basis set | UB3LYP         |                |                |                | UPBE0          |                |                |                | TPSS0          |                |                |                |
|-------------------------------------|------|--------------------------------|-----------|----------------|----------------|----------------|----------------|----------------|----------------|----------------|----------------|----------------|----------------|----------------|----------------|
|                                     |      |                                |           | $g_z$          | $g_y$          | $g_x$          | $g_{iso}$      | $g_z$          | $g_y$          | $g_x$          | $g_{iso}$      | $g_z$          | $g_y$          | $g_x$          | $g_{iso}$      |
| <b>m2(S=1)</b>                      | 4    | $[Al_2(sq)_2(H_2O)_2]^{*..4+}$ | IGLO-II   | 2.00231        | 2.00412        | 2.00421        | 2.00355        | 2.00232        | 2.00403        | 2.00419        | 2.00351        | 2.00232        | 2.00385        | 2.00410        | 2.00342        |
|                                     |      |                                | IGLO-III  | 2.00231        | 2.00406        | 2.00431        | 2.00356        | 2.00232        | 2.00397        | 2.00429        | 2.00353        | 2.00231        | 2.00380        | 2.00419        | 2.00344        |
| <b>m5(S=1)</b>                      | 5    | $[Al_2(sq)_2(H_2O)_4]^{*..4+}$ | IGLO-II   | 2.00236        | 2.00414        | 2.00479        | 2.00377        | 2.00236        | 2.00410        | 2.00473        | 2.00373        | 2.00236        | 2.00398        | 2.00455        | 2.00363        |
|                                     |      |                                | IGLO-III  | 2.00235        | 2.00416        | 2.00469        | 2.00373        | 2.00236        | 2.00410        | 2.00463        | 2.00370        | 2.00235        | 2.00397        | 2.00448        | 2.00360        |
| <b>m8(S=1)</b>                      | 6    | $[Al_2(sq)_2(H_2O)_6]^{*..4+}$ | IGLO-II   | 2.00231        | 2.00490        | 2.00641        | 2.00454        | 2.00232        | 2.00487        | 2.00628        | 2.00449        | 2.00232        | 2.00477        | 2.00592        | 2.00434        |
|                                     |      |                                | IGLO-III  | 2.00231        | 2.00509        | 2.00629        | 2.00456        | 2.00232        | 2.00506        | 2.00616        | 2.00451        | 2.00232        | 2.00495        | 2.00582        | 2.00436        |
| <b>m11(S=1)</b>                     | 6    | $[Al_2(sq)_2(H_2O)_6]^{*..4+}$ | IGLO-II   | 2.00234        | 2.00461        | 2.00490        | 2.00395        | 2.00235        | 2.00458        | 2.00478        | 2.00390        | 2.00235        | 2.00447        | 2.00454        | 2.00379        |
|                                     |      |                                | IGLO-III  | 2.00235        | 2.00471        | 2.00482        | 2.00396        | 2.00235        | 2.00466        | 2.00472        | 2.00391        | 2.00235        | 2.00446        | 2.00458        | 2.00380        |
| <b>m14(S=1)</b>                     | 6    | $[Al_2(sq)_2(H_2O)_6]^{*..4+}$ | IGLO-II   | 2.00235        | 2.00452        | 2.00502        | 2.00396        | 2.00236        | 2.00447        | 2.00495        | 2.00393        | 2.00236        | 2.00435        | 2.00474        | 2.00382        |
|                                     |      |                                | IGLO-III  | 2.00235        | 2.00456        | 2.00491        | 2.00394        | 2.00235        | 2.00450        | 2.00484        | 2.00390        | 2.00235        | 2.00436        | 2.00467        | 2.00379        |
| <i>experimental for complex (1)</i> |      |                                |           | <b>2.00204</b> | <b>2.00377</b> | <b>2.00455</b> | <b>2.00367</b> | <b>2.00204</b> | <b>2.00377</b> | <b>2.00455</b> | <b>2.00367</b> | <b>2.00204</b> | <b>2.00377</b> | <b>2.00455</b> | <b>2.00367</b> |

**Table S6** The isotropic hyperfine coupling constant due to  $^{27}Al$  ( $a_{Al}$ ) calculated at the DFT and DLPNO-CCSD level for the S = 1 counterparts of **m2**, **m5**, **m8**, **m11** and **m14**. The values are given in MHz.

| model                             | c.n. | composition                    | basis set | B3LYP     | PBE0      | TPSS0     | wB97X     | B2PLYP    | mPW2PLYP  | DSD-BLYP  | DLPNO-CCSD |
|-----------------------------------|------|--------------------------------|-----------|-----------|-----------|-----------|-----------|-----------|-----------|-----------|------------|
| <b>m2(S=1)</b>                    | 4    | $[Al_2(sq)_2(H_2O)_2]^{*..4+}$ | IGLO-II   | -7.06     | -6.30     | -6.08     | -7.27     | -6.63     | -6.93     | -7.17     | -6.26      |
|                                   |      |                                | IGLO-III  | -6.66     | -5.93     | -5.79     | -6.96     | -6.66     | -6.61     | -7.17     | -          |
| <b>m5(S=1)</b>                    | 5    | $[Al_2(sq)_2(H_2O)_4]^{*..4+}$ | IGLO-II   | -7.29     | -7.05     | -6.78     | -7.36     | -6.98     | -7.16     | -6.54     | -6.75      |
|                                   |      |                                | IGLO-III  | -6.86     | -6.61     | -6.58     | -6.89     | -6.86     | -6.74     | -6.54     | -          |
| <b>m8(S=1)</b>                    | 6    | $[Al_2(sq)_2(H_2O)_6]^{*..4+}$ | IGLO-II   | -8.53     | -8.42     | -8.27     | -8.68     | -8.44     | -8.57     | -8.70     | -8.11      |
|                                   |      |                                | IGLO-III  | -7.96     | -7.84     | -8.06     | -8.01     | -7.96     | -7.96     | -8.70     | -          |
| <b>m11(S=1)</b>                   | 6    | $[Al_2(sq)_2(H_2O)_6]^{*..4+}$ | IGLO-II   | -6.83     | -6.39     | -7.72     | -6.70     | -6.65     | -6.85     | -7.54     | -6.11      |
|                                   |      |                                | IGLO-III  | -6.44     | -6.01     | -7.43     | -6.35     | -6.44     | -6.47     | -7.54     | -          |
| <b>m14(S=1)</b>                   | 6    | $[Al_2(sq)_2(H_2O)_6]^{*..4+}$ | IGLO-II   | -7.98     | -7.85     | -7.79     | -8.12     | -7.76     | -7.93     | -7.37     | -7.75      |
|                                   |      |                                | IGLO-III  | -7.52     | -7.37     | -7.53     | -7.56     | -7.52     | -7.45     | -7.37     | -          |
| <i>experimental for complex 1</i> |      |                                |           | $\pm 2.5$  |

**Table S7** The isotropic hyperfine coupling constant due to  $^1\text{H}$  calculated at the DFT and DLPNO-CCSD level for the  $S = 1$  counterparts of **m2**, **m5**, **m8**, **m11** and **m14**. The values are given in MHz.

| model           | c.n. | composition                                                | basis set | B3LYP |       | PBE0  |       | TPSS0 |       | wB97X |       |
|-----------------|------|------------------------------------------------------------|-----------|-------|-------|-------|-------|-------|-------|-------|-------|
|                 |      |                                                            |           | H1    | H2    | H1    | H2    | H1    | H2    | H1    | H2    |
| <b>m2(S=1)</b>  | 4    | $[\text{Al}_2(\text{sq})_2(\text{H}_2\text{O})_2]^{*..4+}$ | IGLO-II   | -1.51 | -7.49 | -2.11 | -8.32 | -2.26 | -9.28 | -2.41 | -8.23 |
|                 |      |                                                            | IGLO-III  | -1.24 | -7.12 | -1.75 | -7.84 | -1.73 | -8.51 | -1.96 | -7.42 |
| <b>m5(S=1)</b>  | 5    | $[\text{Al}_2(\text{sq})_2(\text{H}_2\text{O})_4]^{*..4+}$ | IGLO-II   | -0.02 | -6.82 | -0.31 | -7.49 | -0.21 | -8.21 | -0.31 | -7.29 |
|                 |      |                                                            | IGLO-III  | -0.07 | -6.54 | -0.22 | -7.13 | -0.05 | -7.62 | -0.24 | -6.66 |
| <b>m8(S=1)</b>  | 6    | $[\text{Al}_2(\text{sq})_2(\text{H}_2\text{O})_6]^{*..4+}$ | IGLO-II   | -0.73 | -5.72 | -1.15 | -6.31 | -1.23 | -7.01 | -1.43 | -6.24 |
|                 |      |                                                            | IGLO-III  | -0.57 | -5.53 | -0.93 | -6.06 | -0.86 | -6.56 | -1.13 | -5.76 |
| <b>m11(S=1)</b> | 6    | $[\text{Al}_2(\text{sq})_2(\text{H}_2\text{O})_6]^{*..4+}$ | IGLO-II   | -1.23 | -6.89 | -1.78 | -7.66 | -1.91 | -8.55 | -2.09 | -7.62 |
|                 |      |                                                            | IGLO-III  | -1.00 | -6.60 | -1.46 | -7.27 | -1.44 | -7.90 | -1.69 | -6.93 |
| <b>m14(S=1)</b> | 6    | $[\text{Al}_2(\text{sq})_2(\text{H}_2\text{O})_6]^{*..4+}$ | IGLO-II   | -0.36 | -6.48 | -0.72 | -7.12 | -0.68 | -7.82 | -0.82 | -6.95 |
|                 |      |                                                            | IGLO-III  | -0.25 | -6.23 | -0.57 | -6.79 | -0.43 | -7.27 | -0.64 | -6.36 |

**Table S7** Continued.

| model           | c.n. | composition                                                | basis set | B2PLYP |       | mPW2PLYP |       | DSD-BLYP |       | DLPNO-CCSD |       |
|-----------------|------|------------------------------------------------------------|-----------|--------|-------|----------|-------|----------|-------|------------|-------|
|                 |      |                                                            |           | H1     | H2    | H1       | H2    | H1       | H2    | H1         | H2    |
| <b>m2(S=1)</b>  | 4    | $[\text{Al}_2(\text{sq})_2(\text{H}_2\text{O})_2]^{*..4+}$ | IGLO-II   | -0.63  | -7.60 | -1.07    | -7.93 | -0.78    | -7.27 | -2.19      | -8.88 |
|                 |      |                                                            | IGLO-III  | -0.27  | -7.15 | -0.68    | -7.44 | -0.71    | -7.03 | –          | –     |
| <b>m5(S=1)</b>  | 5    | $[\text{Al}_2(\text{sq})_2(\text{H}_2\text{O})_4]^{*..4+}$ | IGLO-II   | -0.28  | -8.05 | -0.06    | -8.14 | -0.68    | -8.92 | -0.11      | -8.33 |
|                 |      |                                                            | IGLO-III  | -0.46  | -7.61 | -0.23    | -7.69 | -0.61    | -8.50 | –          | –     |
| <b>m8(S=1)</b>  | 6    | $[\text{Al}_2(\text{sq})_2(\text{H}_2\text{O})_6]^{*..4+}$ | IGLO-II   | -0.08  | -5.88 | -0.44    | -6.16 | -0.81    | -7.89 | -1.17      | -6.69 |
|                 |      |                                                            | IGLO-III  | -0.21  | -5.61 | -0.13    | -5.86 | -0.80    | -7.64 | –          | –     |
| <b>m11(S=1)</b> | 6    | $[\text{Al}_2(\text{sq})_2(\text{H}_2\text{O})_6]^{*..4+}$ | IGLO-II   | -0.33  | -6.93 | -0.75    | -7.26 | -1.22    | -6.41 | -1.84      | -8.08 |
|                 |      |                                                            | IGLO-III  | -0.01  | -6.58 | -0.40    | -6.88 | -1.13    | -6.08 | –          | –     |
| <b>m14(S=1)</b> | 6    | $[\text{Al}_2(\text{sq})_2(\text{H}_2\text{O})_6]^{*..4+}$ | IGLO-II   | -0.19  | -7.59 | -0.44    | -7.72 | -0.59    | -7.68 | -0.66      | -7.87 |
|                 |      |                                                            | IGLO-III  | -0.07  | -7.18 | -0.17    | -7.29 | -0.51    | -7.38 | –          | –     |
